# Supplementary material for: Improving the anticancer activity of platinum(iv) prodrugs using a dual-targeting strategy with a dichloroacetate axial ligand
Source: Royal Society of Chemistry journal article supplement (doi:10.1039/c9ra03690c), 2019-01-01
Supplement: c9ra03690c1.pdf [file c9ra03690c1.pdf]

## Supplementary Information for:

# Improving the anticancer activity of platinum(IV) prodrugs using a dual-targeting strategy with dichloroacetate axial ligand

Fengfan Liu<sup>a</sup>, Xiaomei Dong<sup>a</sup>, Qiwen Shi<sup>a</sup>, Jianli Chen<sup>b</sup>, Weike Su<sup>a,b\*</sup>

<sup>a</sup> National Engineering Research Center for Process Development of Active Pharmaceutical Ingredients, Collaborative Innovation Center of Yangtze River Delta Region Green Pharmaceuticals, Zhejiang University of Technology, Hangzhou, P. R. China.

<sup>b</sup> College of Pharmaceutical Sciences, Zhejiang University of Technology, Hangzhou, P. R. China.

## Content

|                                                               |           |
|---------------------------------------------------------------|-----------|
| <b>1. NMR spectra of complexes 1a-2b</b>                      | <b>2</b>  |
| <b>2. The stability of complexes 1a-2b in MeOH/PBS buffer</b> | <b>13</b> |
| <b>3. The stability of complexes 1a-2b in MeOH</b>            | <b>18</b> |
| <b>4. Cell apoptosis and cell cycle arrest tests</b>          | <b>22</b> |

# 1. NMR spectra of complexes 1a-2b

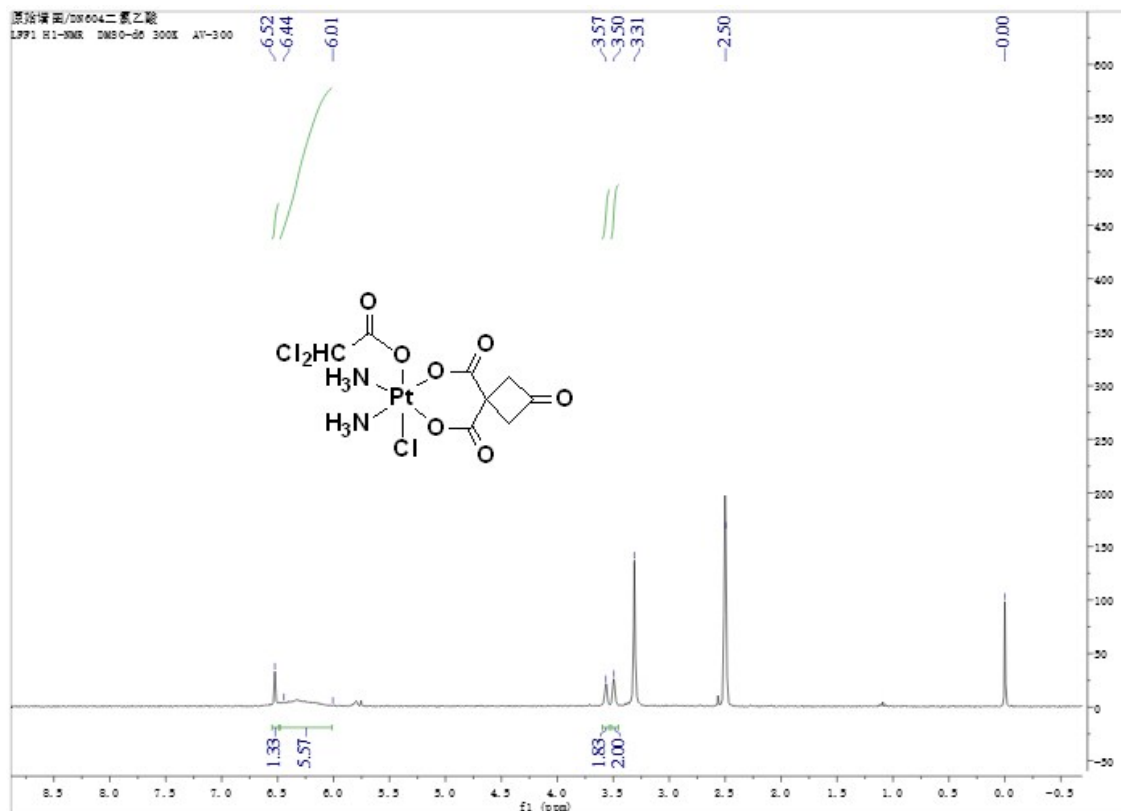

Fig. S1. <sup>1</sup>H NMR (DMSO) spectrum of complex 1a

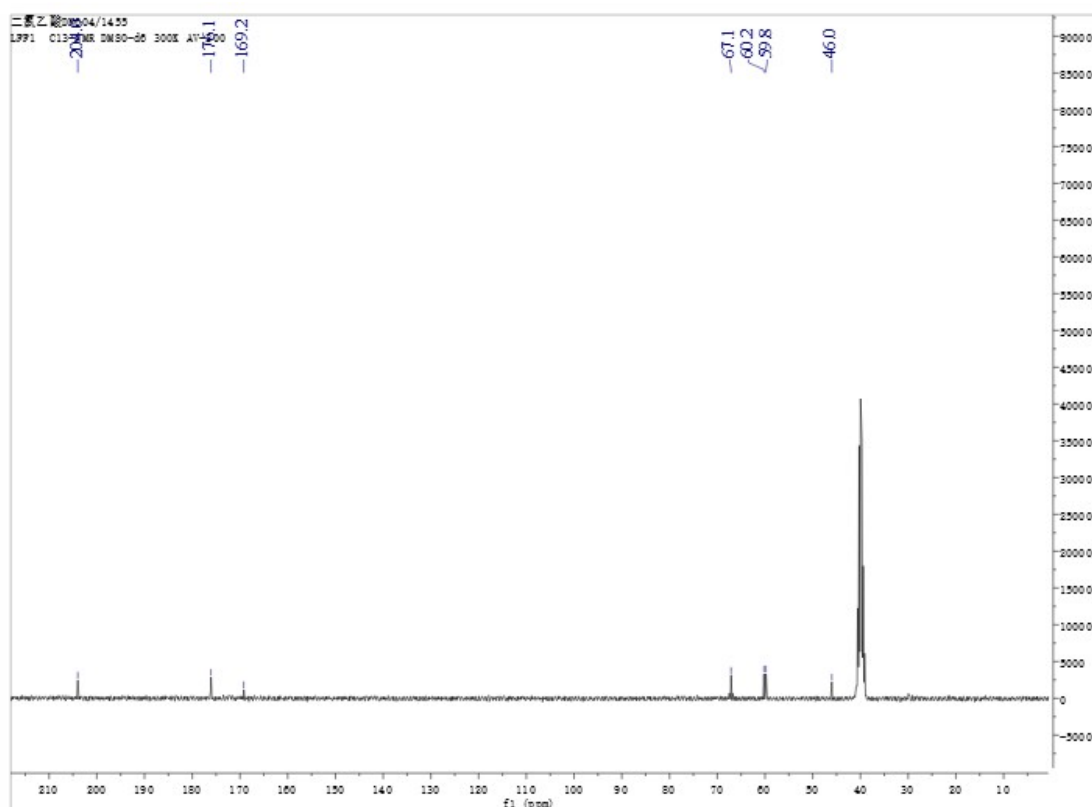

Fig. S2. <sup>13</sup>C NMR (DMSO) spectrum of complex 1a

### Acquisition Parameter

|             |            |                      |          |                  |           |
|-------------|------------|----------------------|----------|------------------|-----------|
| Source Type | ESI        | Ion Polarity         | Positive | Set Nebulizer    | 0.4 Bar   |
| Focus       | Not active | Set Capillary        | 4500 V   | Set Dry Heater   | 200 °C    |
| Scan Begin  | 50 m/z     | Set End Plate Offset | -500 V   | Set Dry Gas      | 3.0 l/min |
| Scan End    | 1200 m/z   | Set Charging Voltage | 2000 V   | Set Divert Valve | Waste     |
|             |            | Set Corona           | 0 nA     | Set APCI Heater  | 0 °C      |

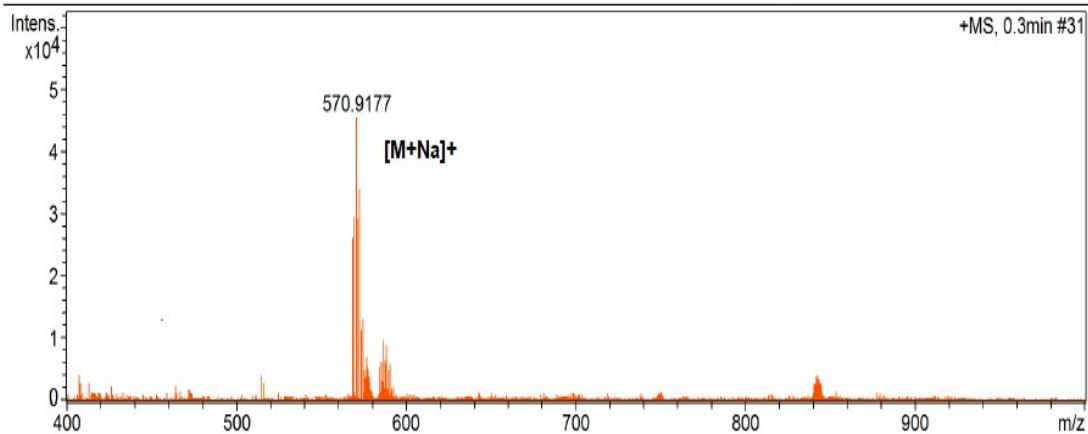

| Meas. m/z | Ion Formula                                                                       | Sum Formula                                                                     | m/z      | err [ppm] |
|-----------|-----------------------------------------------------------------------------------|---------------------------------------------------------------------------------|----------|-----------|
| 569.9196  | C <sub>8</sub> H <sub>11</sub> Cl <sub>3</sub> N <sub>2</sub> NaO <sub>7</sub> Pt | C <sub>8</sub> H <sub>11</sub> Cl <sub>3</sub> N <sub>2</sub> O <sub>7</sub> Pt | 569.9172 | -4.0      |

### Acquisition Parameter

|             |            |                      |          |                  |           |
|-------------|------------|----------------------|----------|------------------|-----------|
| Source Type | ESI        | Ion Polarity         | Positive | Set Nebulizer    | 0.4 Bar   |
| Focus       | Not active | Set Capillary        | 4500 V   | Set Dry Heater   | 200 °C    |
| Scan Begin  | 50 m/z     | Set End Plate Offset | -500 V   | Set Dry Gas      | 3.0 l/min |
| Scan End    | 1200 m/z   | Set Charging Voltage | 2000 V   | Set Divert Valve | Waste     |
|             |            | Set Corona           | 0 nA     | Set APCI Heater  | 0 °C      |

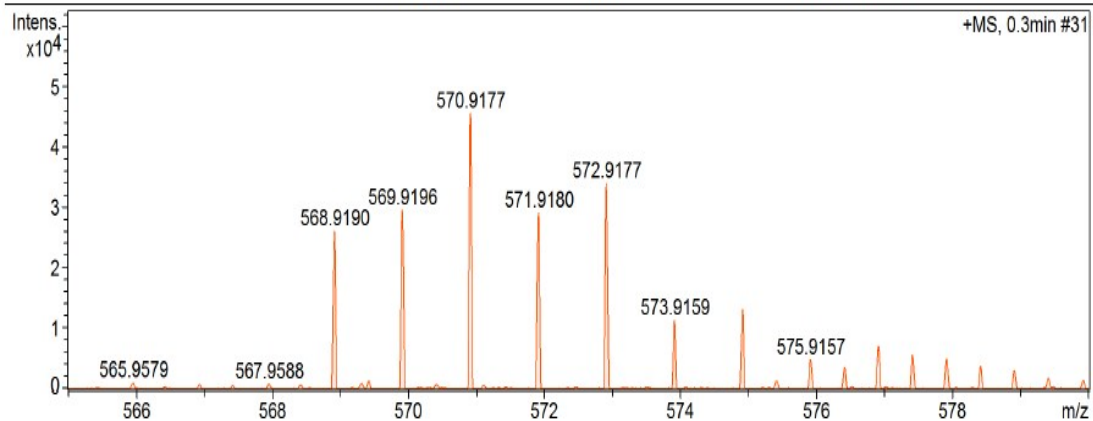

| Meas. m/z | Ion Formula                                                                       | Sum Formula                                                                     | m/z      | err [ppm] |
|-----------|-----------------------------------------------------------------------------------|---------------------------------------------------------------------------------|----------|-----------|
| 569.9196  | C <sub>8</sub> H <sub>11</sub> Cl <sub>3</sub> N <sub>2</sub> NaO <sub>7</sub> Pt | C <sub>8</sub> H <sub>11</sub> Cl <sub>3</sub> N <sub>2</sub> O <sub>7</sub> Pt | 569.9172 | -4.0      |

Fig. S3. HR-MS (ESI) spectrum of complex 1a

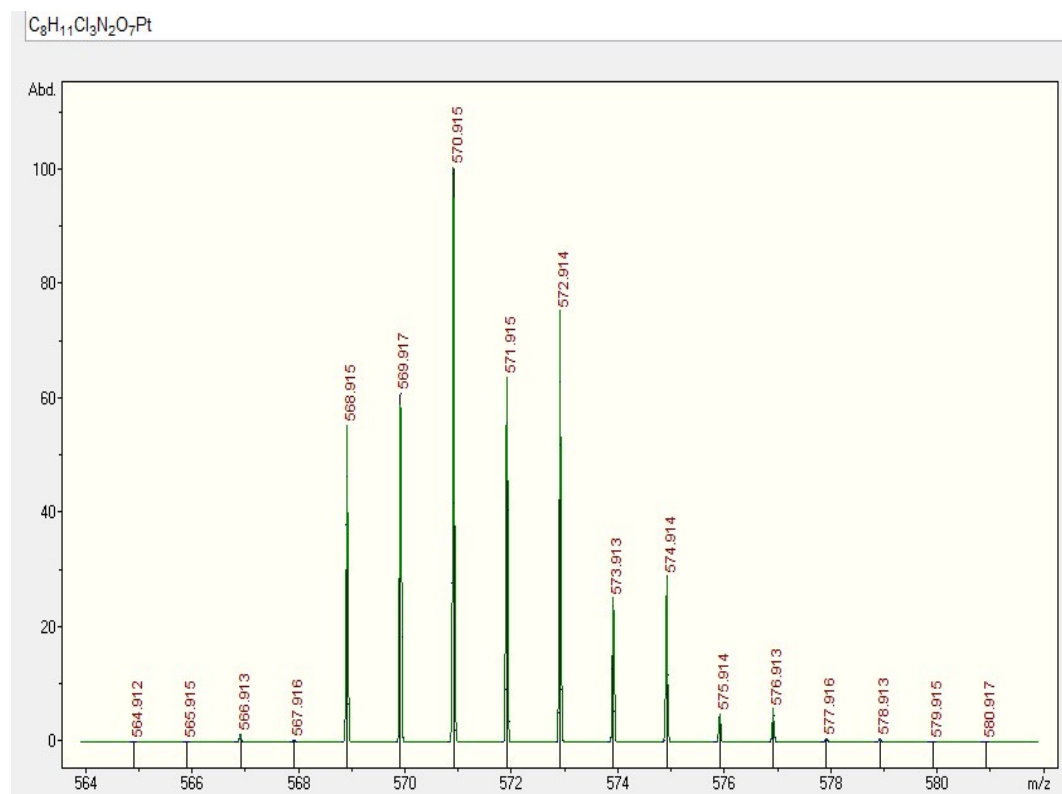

Fig. S4. The simulation of HR-MS (ESI) spectrum of complex 1a

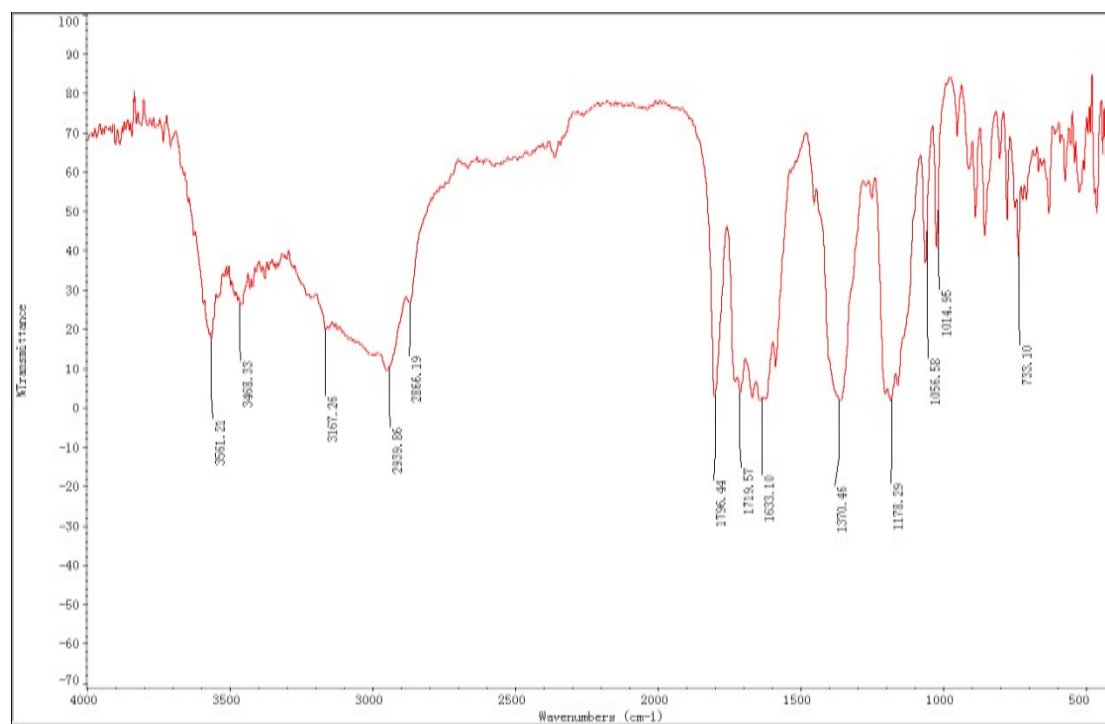

Fig. S5. IR spectrum of complex 1a

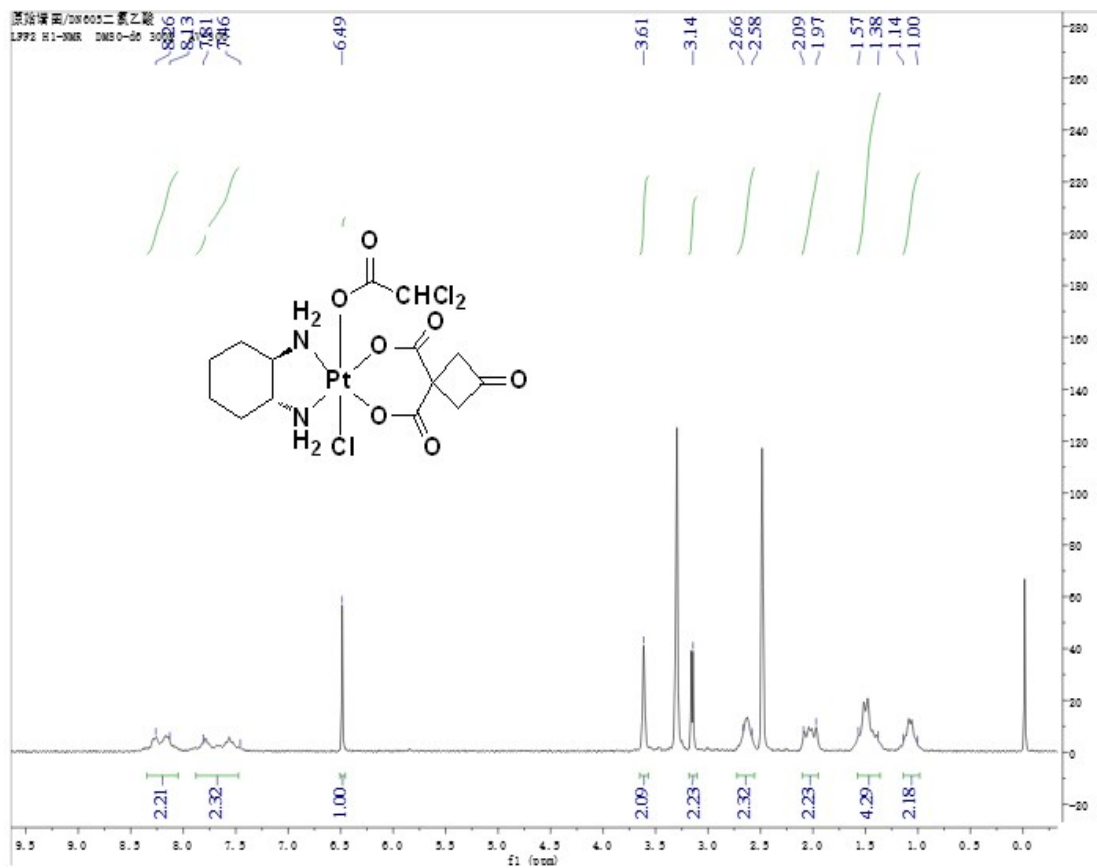

Fig. S6. <sup>1</sup>H NMR (DMSO) spectrum of complex 1b

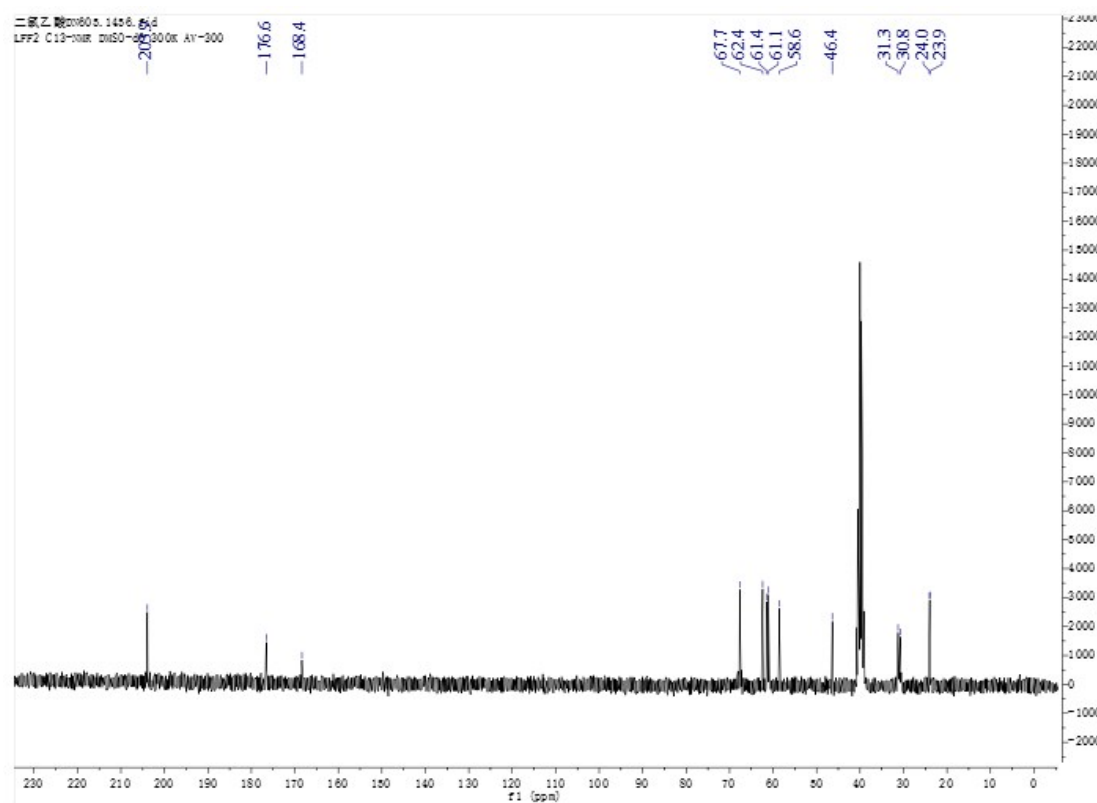

Fig. S7. <sup>13</sup>C NMR (DMSO) spectrum of complex 1b

### Acquisition Parameter

|             |            |                      |          |                  |           |
|-------------|------------|----------------------|----------|------------------|-----------|
| Source Type | ESI        | Ion Polarity         | Positive | Set Nebulizer    | 0.4 Bar   |
| Focus       | Not active | Set Capillary        | 4500 V   | Set Dry Heater   | 200 °C    |
| Scan Begin  | 50 m/z     | Set End Plate Offset | -500 V   | Set Dry Gas      | 3.0 l/min |
| Scan End    | 1200 m/z   | Set Charging Voltage | 2000 V   | Set Divert Valve | Waste     |
|             |            | Set Corona           | 0 nA     | Set APCI Heater  | 0 °C      |

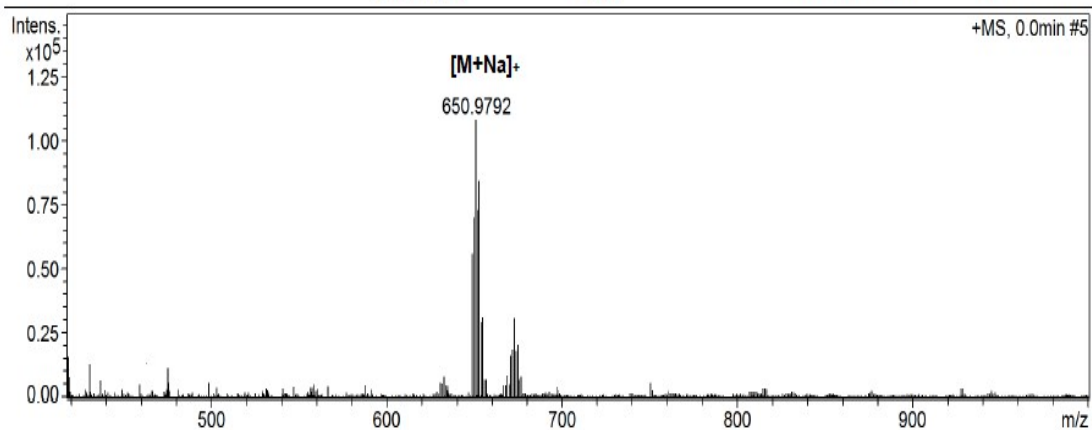

| Meas. m/z | Ion Formula                                                                        | Sum Formula                                                                      | m/z      | err [ppm] |
|-----------|------------------------------------------------------------------------------------|----------------------------------------------------------------------------------|----------|-----------|
| 649.9818  | C <sub>14</sub> H <sub>19</sub> Cl <sub>3</sub> N <sub>2</sub> NaO <sub>7</sub> Pt | C <sub>14</sub> H <sub>19</sub> Cl <sub>3</sub> N <sub>2</sub> O <sub>7</sub> Pt | 649.9798 | -2.9      |

### Acquisition Parameter

|             |            |                      |          |                  |           |
|-------------|------------|----------------------|----------|------------------|-----------|
| Source Type | ESI        | Ion Polarity         | Positive | Set Nebulizer    | 0.4 Bar   |
| Focus       | Not active | Set Capillary        | 4500 V   | Set Dry Heater   | 200 °C    |
| Scan Begin  | 50 m/z     | Set End Plate Offset | -500 V   | Set Dry Gas      | 3.0 l/min |
| Scan End    | 1200 m/z   | Set Charging Voltage | 2000 V   | Set Divert Valve | Waste     |
|             |            | Set Corona           | 0 nA     | Set APCI Heater  | 0 °C      |

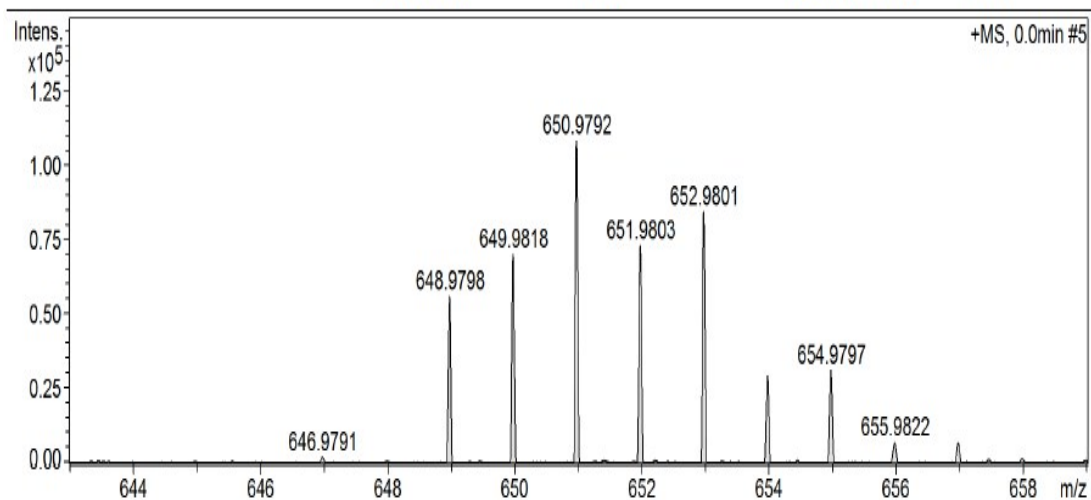

| Meas. m/z | Ion Formula                                                                        | Sum Formula                                                                      | m/z      | err [ppm] |
|-----------|------------------------------------------------------------------------------------|----------------------------------------------------------------------------------|----------|-----------|
| 649.9818  | C <sub>14</sub> H <sub>19</sub> Cl <sub>3</sub> N <sub>2</sub> NaO <sub>7</sub> Pt | C <sub>14</sub> H <sub>19</sub> Cl <sub>3</sub> N <sub>2</sub> O <sub>7</sub> Pt | 649.9798 | -2.9      |

**Fig. S8.** HR-MS (ESI) spectrum of complex 1b

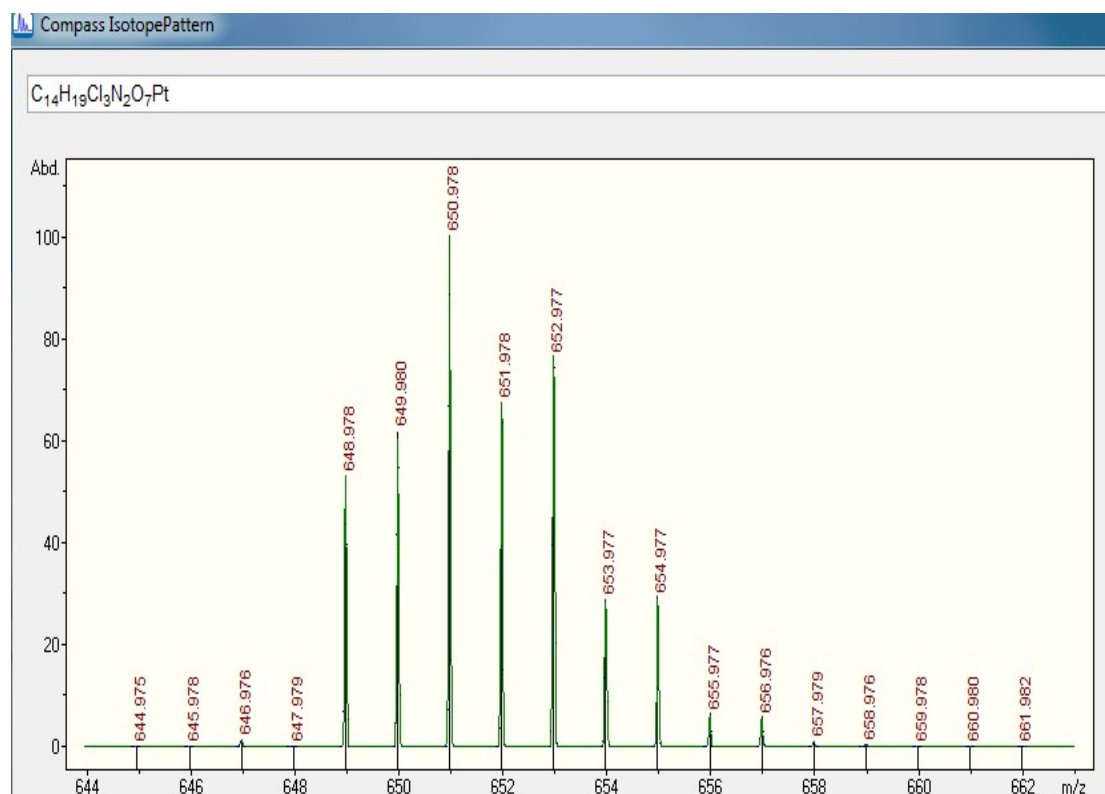

Fig. S9. The simulation of HR-MS (ESI) spectrum of complex 1b

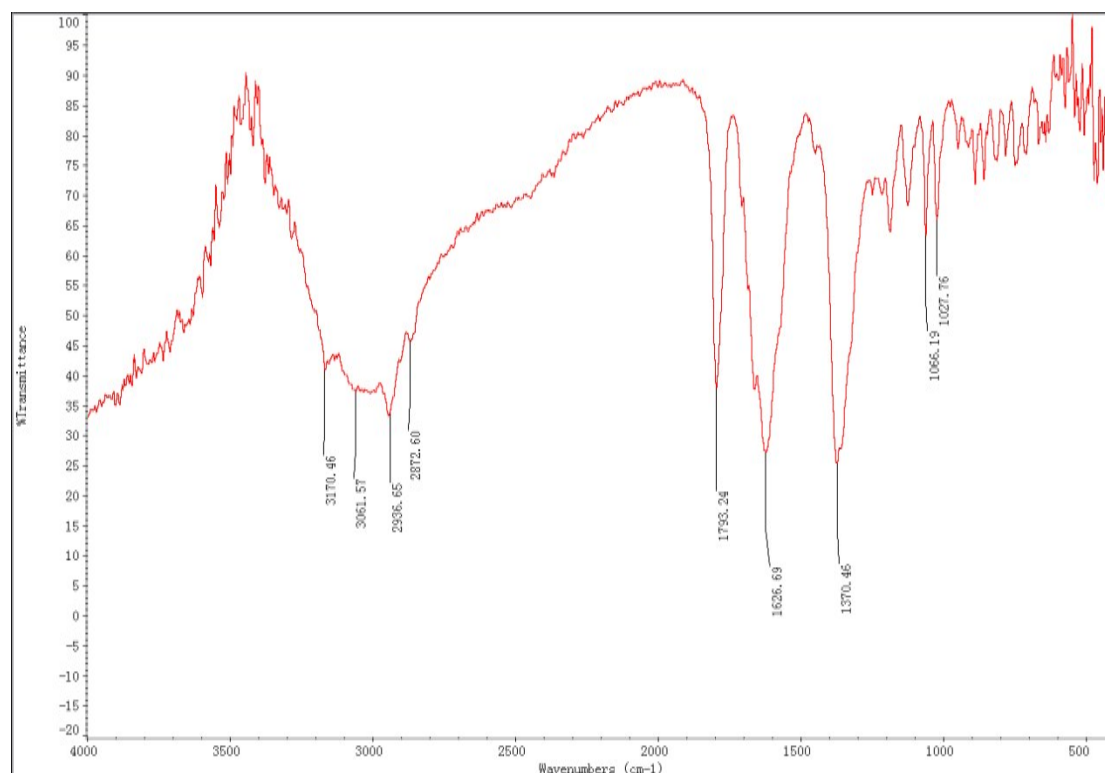

Fig. S10. IR spectrum of complex 1b

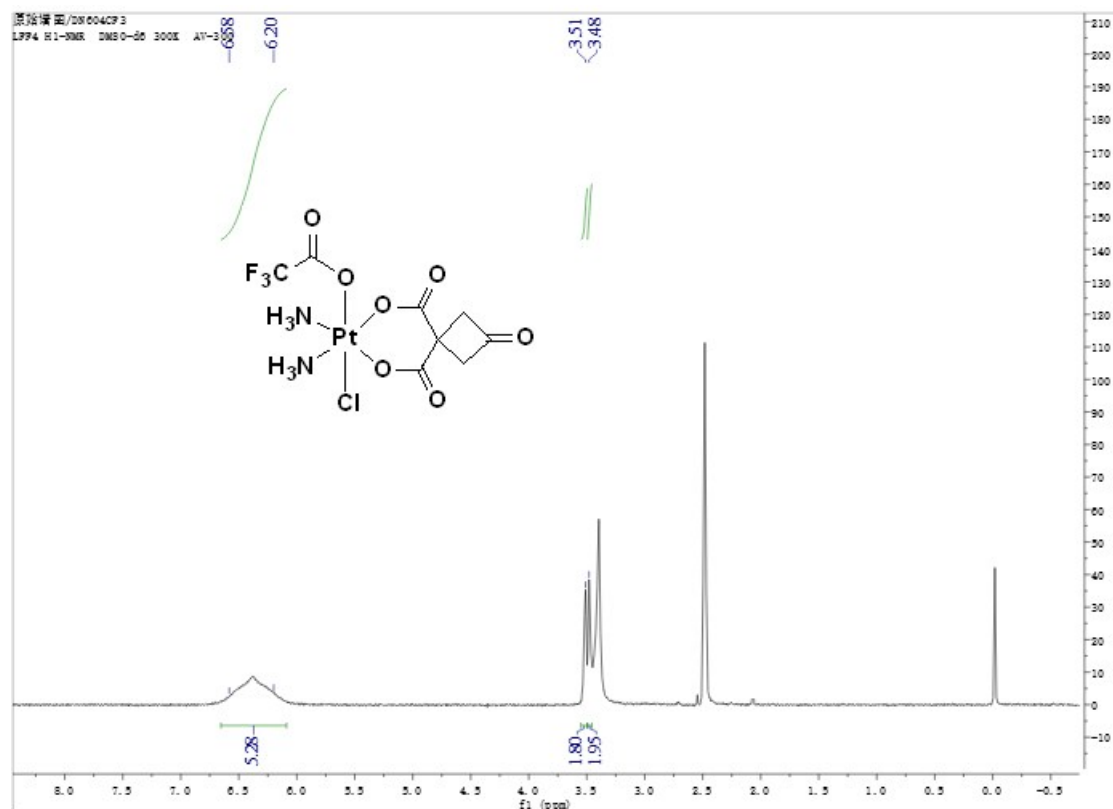

Fig. S11.  $^1\text{H}$  NMR (DMSO) spectrum of complex 2a

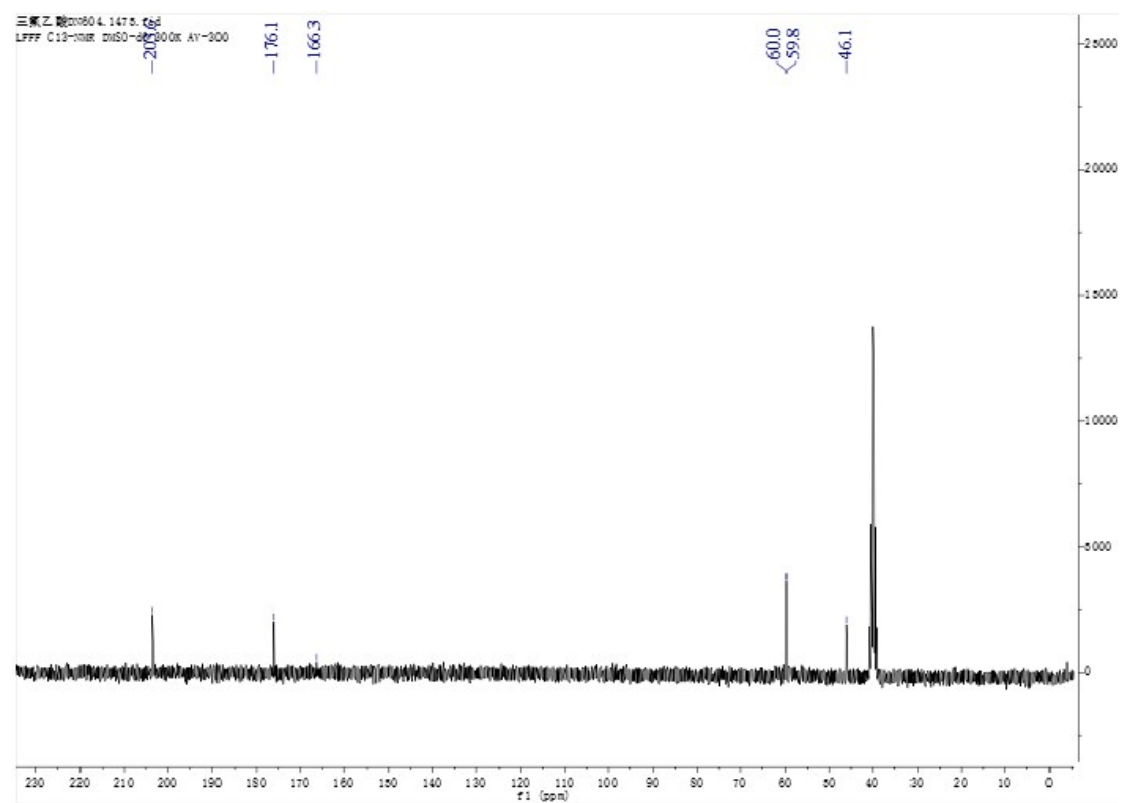

Fig. S12.  $^{13}\text{C}$  NMR (DMSO) spectrum of complex 2a



### Acquisition Parameter

|             |            |                      |          |                  |           |
|-------------|------------|----------------------|----------|------------------|-----------|
| Source Type | ESI        | Ion Polarity         | Positive | Set Nebulizer    | 0.4 Bar   |
| Focus       | Not active | Set Capillary        | 4500 V   | Set Dry Heater   | 200 °C    |
| Scan Begin  | 50 m/z     | Set End Plate Offset | -500 V   | Set Dry Gas      | 3.0 l/min |
| Scan End    | 1200 m/z   | Set Charging Voltage | 2000 V   | Set Divert Valve | Waste     |
|             |            | Set Corona           | 0 nA     | Set APCI Heater  | 0 °C      |

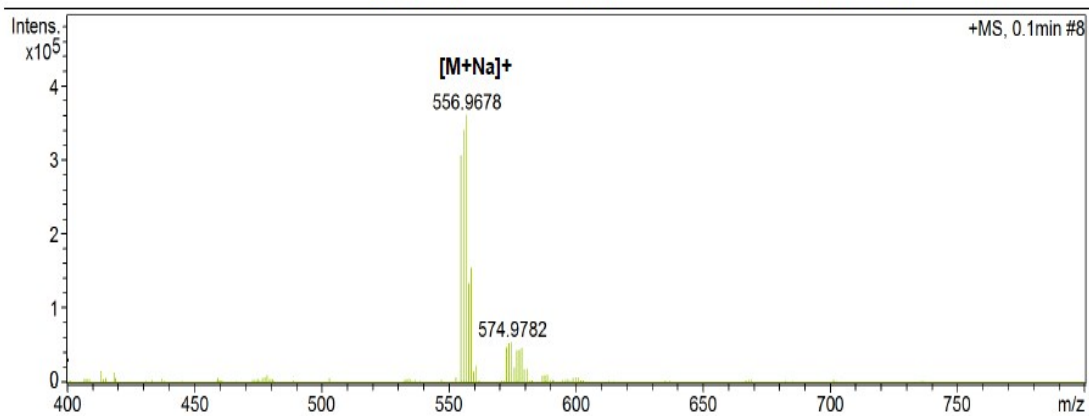

| Meas. m/z | Ion Formula                                                                        | Sum Formula                                                                      | m/z      | err [ppm] |
|-----------|------------------------------------------------------------------------------------|----------------------------------------------------------------------------------|----------|-----------|
| 555.9687  | C <sub>8</sub> H <sub>10</sub> ClF <sub>3</sub> N <sub>2</sub> NaO <sub>7</sub> Pt | C <sub>8</sub> H <sub>10</sub> ClF <sub>3</sub> N <sub>2</sub> O <sub>7</sub> Pt | 555.9669 | -3.2      |

### Acquisition Parameter

|             |            |                      |          |                  |           |
|-------------|------------|----------------------|----------|------------------|-----------|
| Source Type | ESI        | Ion Polarity         | Positive | Set Nebulizer    | 0.4 Bar   |
| Focus       | Not active | Set Capillary        | 4500 V   | Set Dry Heater   | 200 °C    |
| Scan Begin  | 50 m/z     | Set End Plate Offset | -500 V   | Set Dry Gas      | 3.0 l/min |
| Scan End    | 1200 m/z   | Set Charging Voltage | 2000 V   | Set Divert Valve | Waste     |
|             |            | Set Corona           | 0 nA     | Set APCI Heater  | 0 °C      |

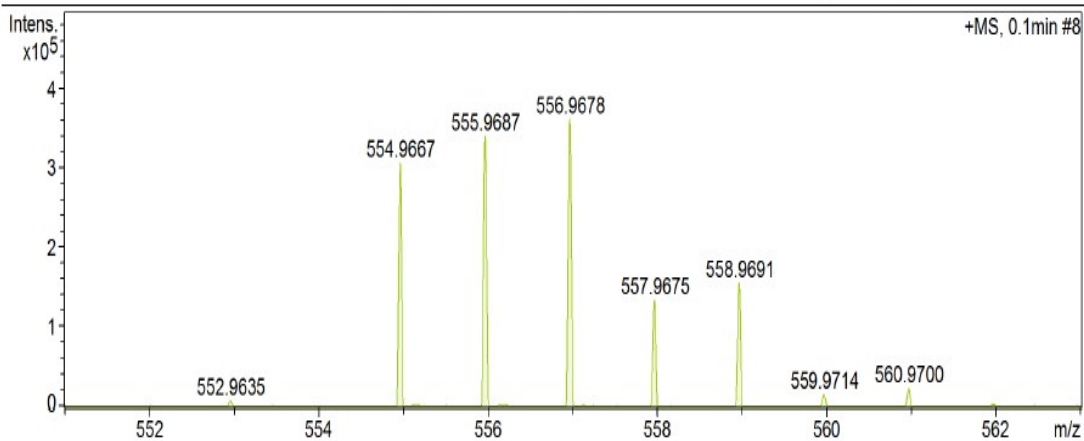

| Meas. m/z | Ion Formula                                                                        | Sum Formula                                                                      | m/z      | err [ppm] |
|-----------|------------------------------------------------------------------------------------|----------------------------------------------------------------------------------|----------|-----------|
| 555.9687  | C <sub>8</sub> H <sub>10</sub> ClF <sub>3</sub> N <sub>2</sub> NaO <sub>7</sub> Pt | C <sub>8</sub> H <sub>10</sub> ClF <sub>3</sub> N <sub>2</sub> O <sub>7</sub> Pt | 555.9669 | -3.2      |

Fig. S13. HR-MS (ESI) spectrum of complex 2a

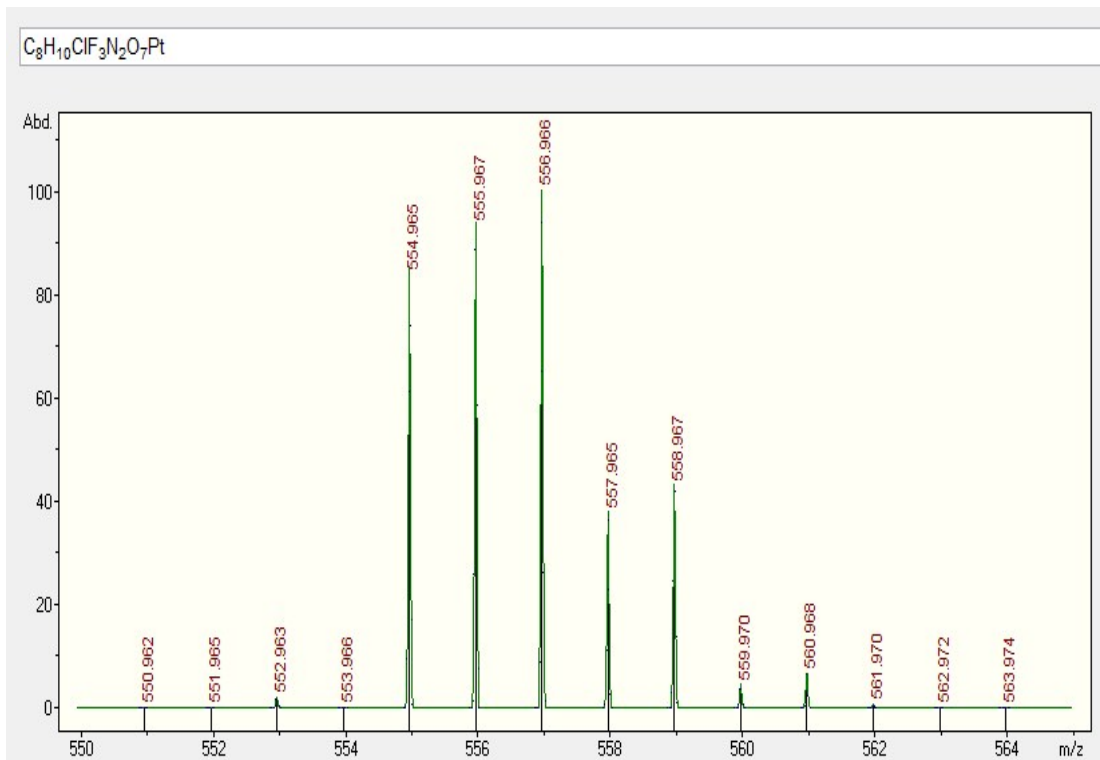

Fig. S14. The simulation of HR-MS (ESI) spectrum of complex 2a

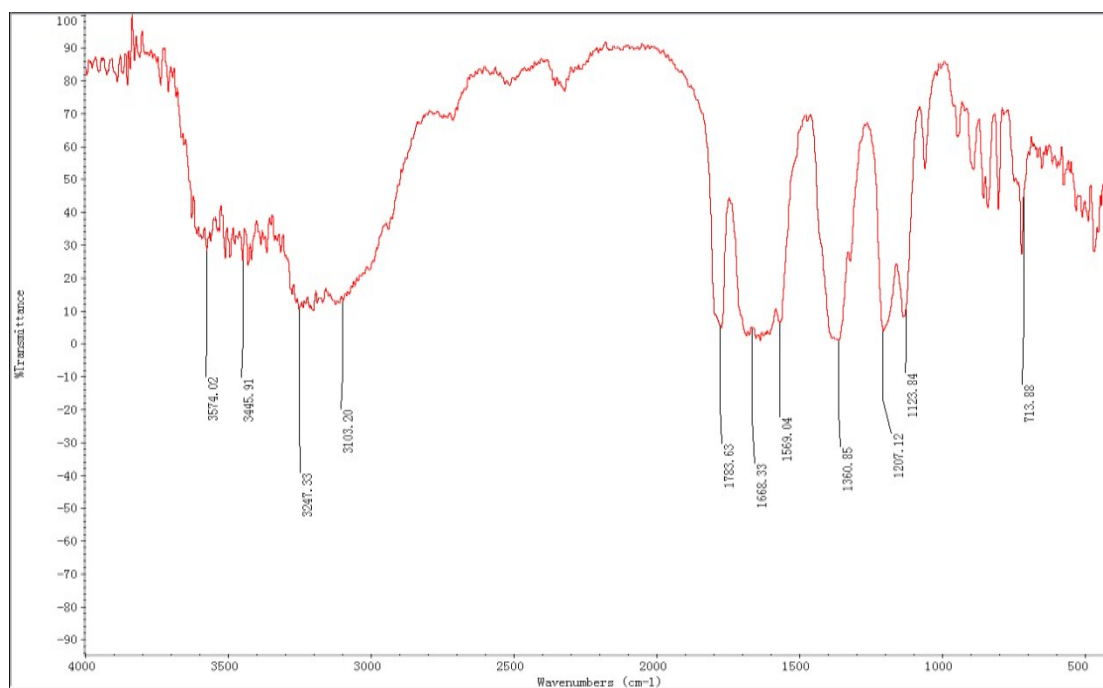

Fig. S15. IR spectrum of complex 2a

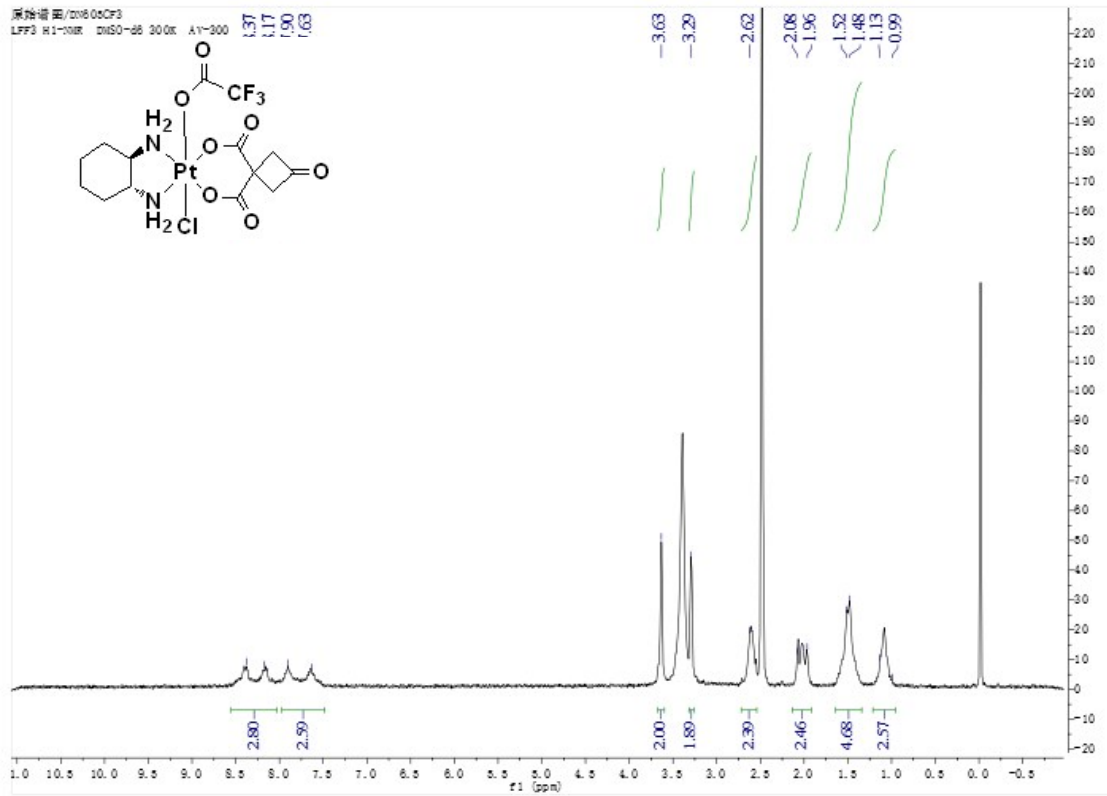

Fig. S16.  $^1\text{H}$  NMR (DMSO) spectrum of complex 2b

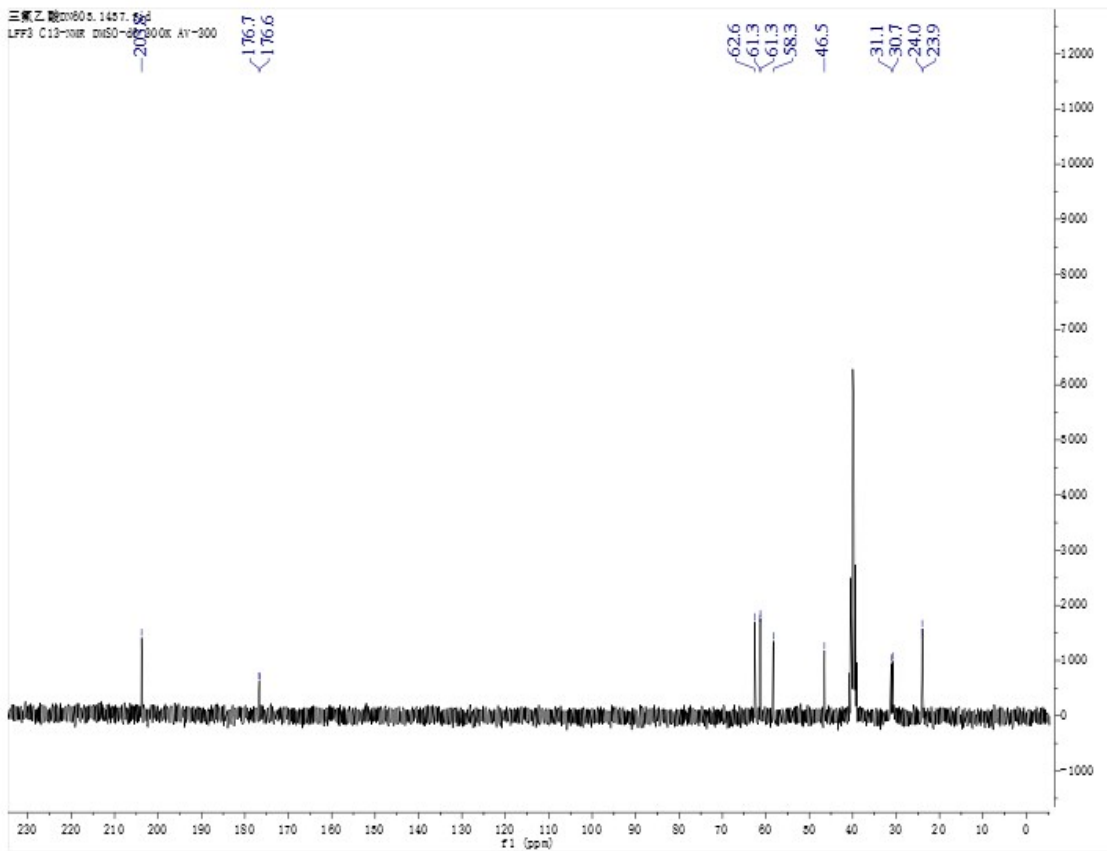

Fig. S17.  $^{13}\text{C}$  NMR (DMSO) spectrum of complex 2b

### Acquisition Parameter

|             |            |                      |          |                  |           |
|-------------|------------|----------------------|----------|------------------|-----------|
| Source Type | ESI        | Ion Polarity         | Positive | Set Nebulizer    | 0.4 Bar   |
| Focus       | Not active | Set Capillary        | 4500 V   | Set Dry Heater   | 200 °C    |
| Scan Begin  | 50 m/z     | Set End Plate Offset | -500 V   | Set Dry Gas      | 3.0 l/min |
| Scan End    | 1200 m/z   | Set Charging Voltage | 2000 V   | Set Divert Valve | Waste     |
|             |            | Set Corona           | 0 nA     | Set APCI Heater  | 0 °C      |

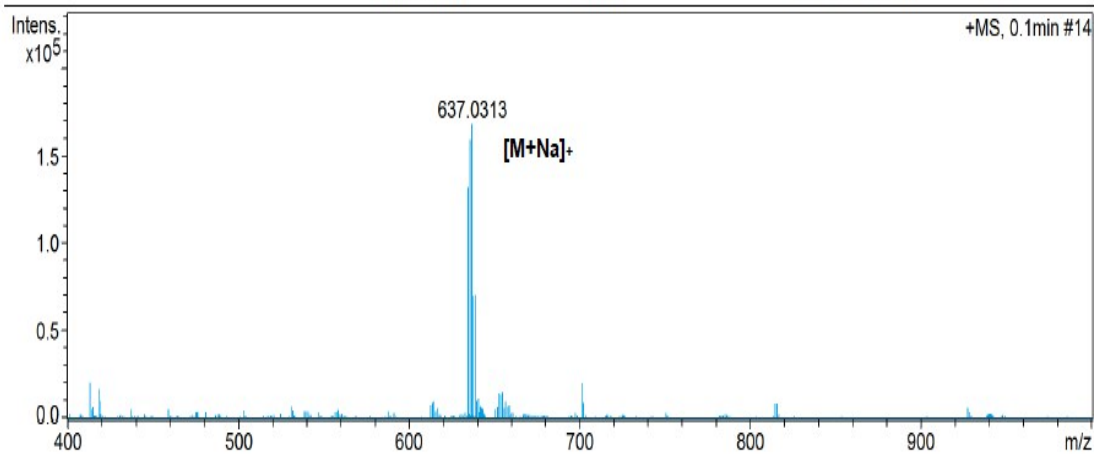

| Meas. m/z | Ion Formula                                                                         | Sum Formula                                                                       | m/z      | err [ppm] |
|-----------|-------------------------------------------------------------------------------------|-----------------------------------------------------------------------------------|----------|-----------|
| 636.0323  | C <sub>14</sub> H <sub>18</sub> ClF <sub>3</sub> N <sub>2</sub> NaO <sub>7</sub> Pt | C <sub>14</sub> H <sub>18</sub> ClF <sub>3</sub> N <sub>2</sub> O <sub>7</sub> Pt | 636.0295 | -4.2      |

### Acquisition Parameter

|             |            |                      |          |                  |           |
|-------------|------------|----------------------|----------|------------------|-----------|
| Source Type | ESI        | Ion Polarity         | Positive | Set Nebulizer    | 0.4 Bar   |
| Focus       | Not active | Set Capillary        | 4500 V   | Set Dry Heater   | 200 °C    |
| Scan Begin  | 50 m/z     | Set End Plate Offset | -500 V   | Set Dry Gas      | 3.0 l/min |
| Scan End    | 1200 m/z   | Set Charging Voltage | 2000 V   | Set Divert Valve | Waste     |
|             |            | Set Corona           | 0 nA     | Set APCI Heater  | 0 °C      |

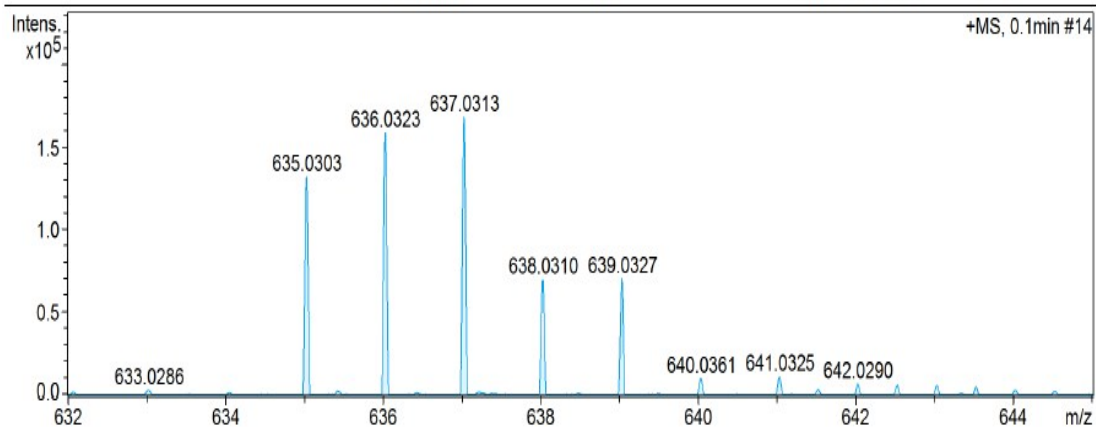

| Meas. m/z | Ion Formula                                                                         | Sum Formula                                                                       | m/z      | err [ppm] |
|-----------|-------------------------------------------------------------------------------------|-----------------------------------------------------------------------------------|----------|-----------|
| 636.0323  | C <sub>14</sub> H <sub>18</sub> ClF <sub>3</sub> N <sub>2</sub> NaO <sub>7</sub> Pt | C <sub>14</sub> H <sub>18</sub> ClF <sub>3</sub> N <sub>2</sub> O <sub>7</sub> Pt | 636.0295 | -4.2      |

Fig. S18. HR-MS (ESI) spectrum of complex 2b

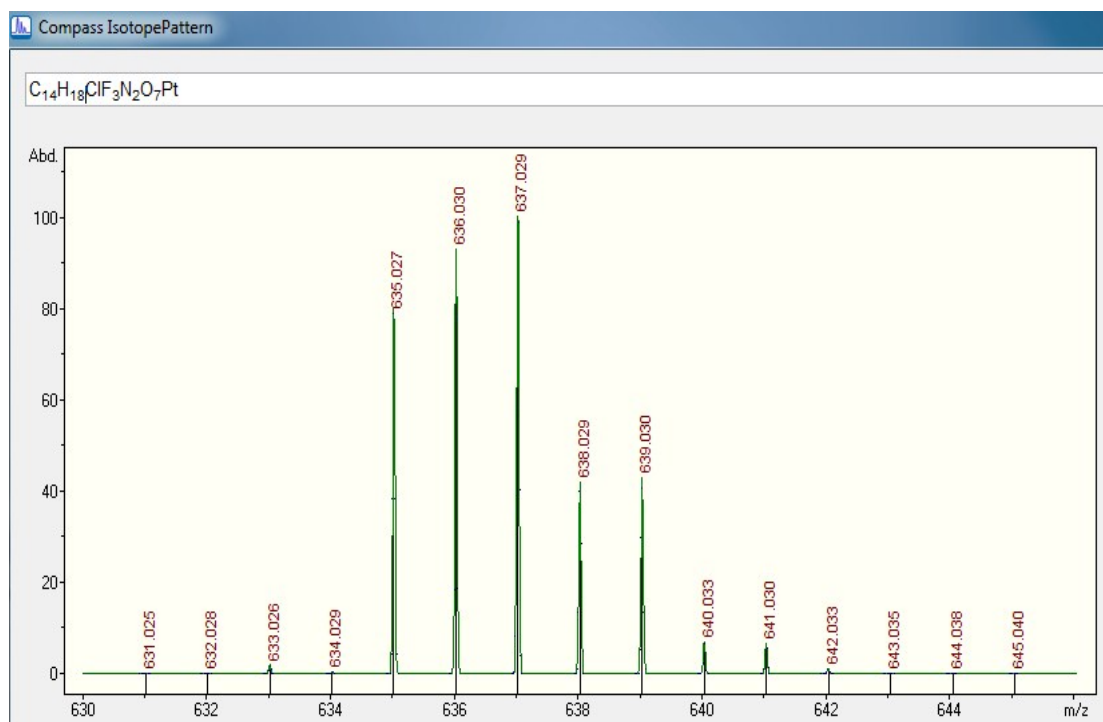

**Fig. S19.** The simulation of HR-MS (ESI) spectrum of complex **2b**

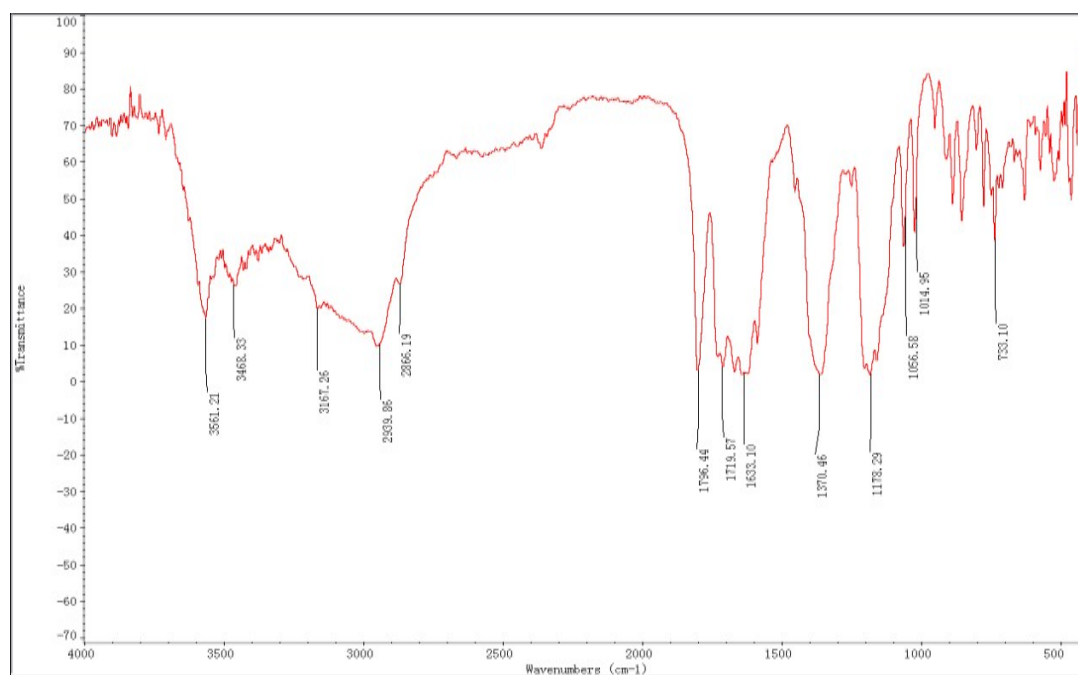

**Fig. S20.** IR spectrum of complex **2b**

## 2. The stability of complexes **1a-2b** in MeOH/PBS buffer

(a) <sup>1</sup>H-NMR (400 MHz) spectra of complex **1a** in deuterated aqueous, phosphate buffered solution

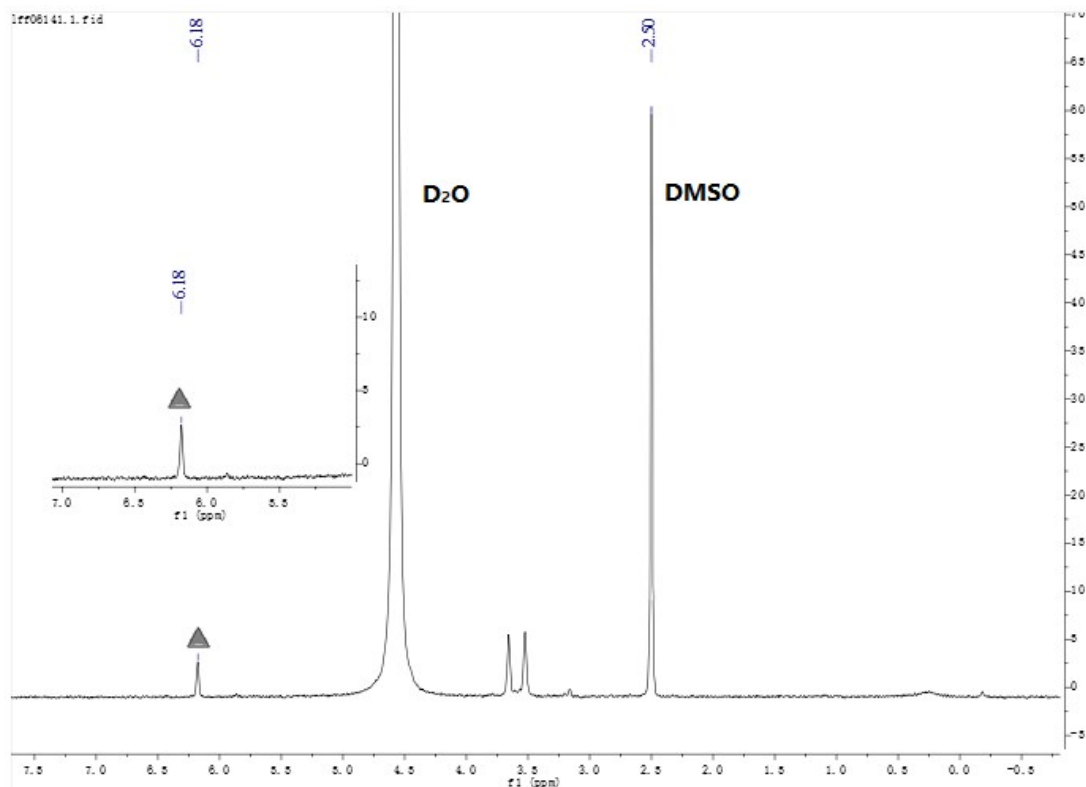

**Fig.21.**  $^1\text{H}$  NMR spectra of complex **1a** treated with PBS (7.87 mM, pH 7.4; at 37°C) at 0 min (DMSO- $d_6$ /D $_2$ O, 10/90, v/v). ▲ indicates the peak of coordinated DCA in complex **1a**.

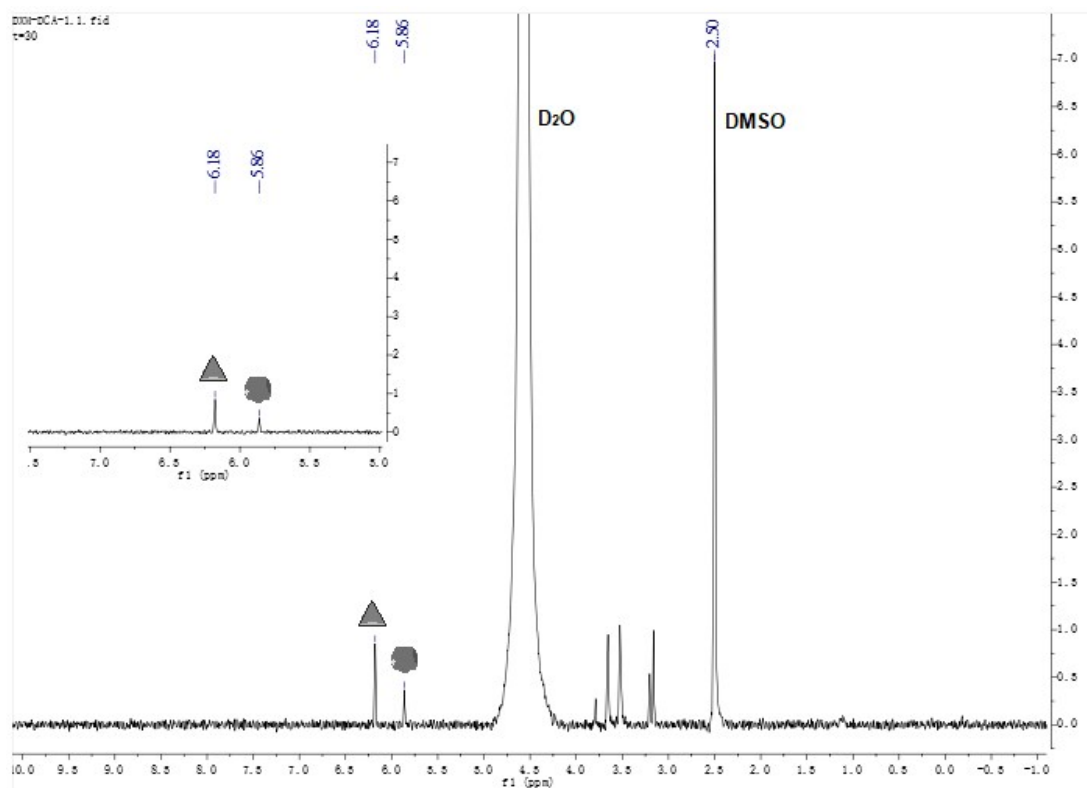

**Fig.22.**  $^1\text{H}$  NMR spectra of complex **1a** treated with PBS (7.87 mM, pH 7.4; at 37°C) at 50 mins (DMSO- $d_6$ /D $_2$ O, 10/90, v/v). ▲ indicates the peak of coordinated DCA in complex **1a**. ● indicates the peak of free DCA.

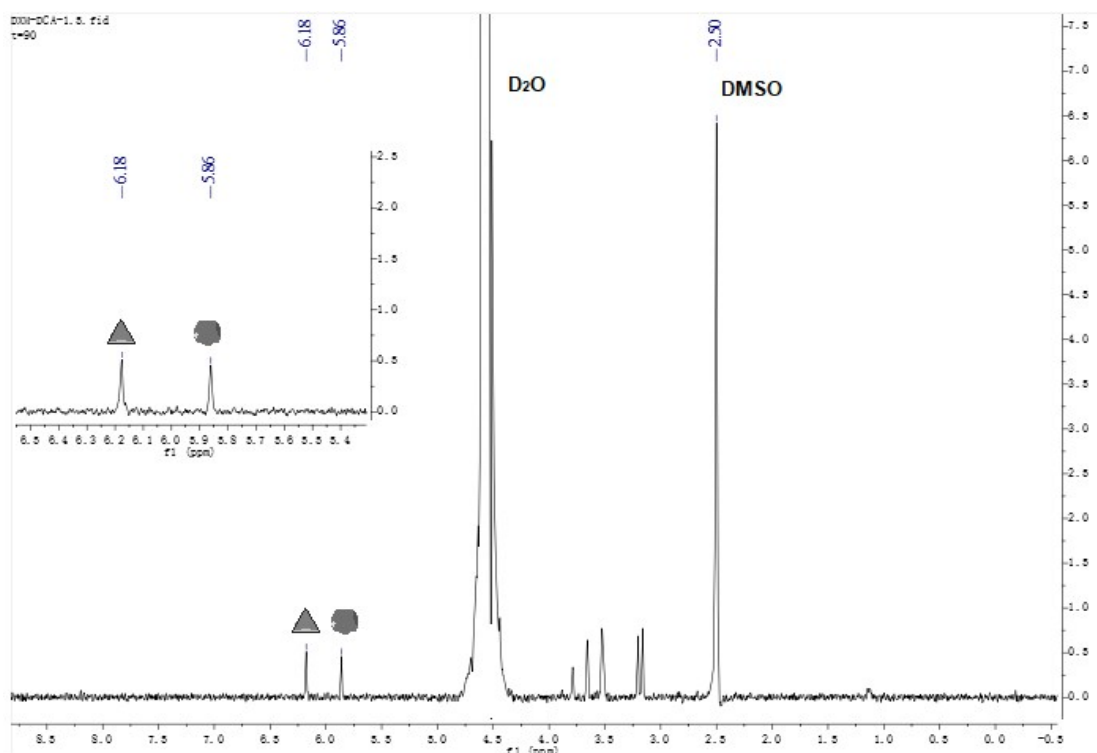

**Fig.23.** <sup>1</sup>H NMR spectra of complex **1a** treated with PBS (7.87 mM, pH 7.4; at 37°C) at 100 mins (DMSO-*d*<sub>6</sub>/D<sub>2</sub>O, 10/90, v/v). ▲ indicates the peak of coordinated DCA in complex **1a**. ● indicates the peak of free DCA.

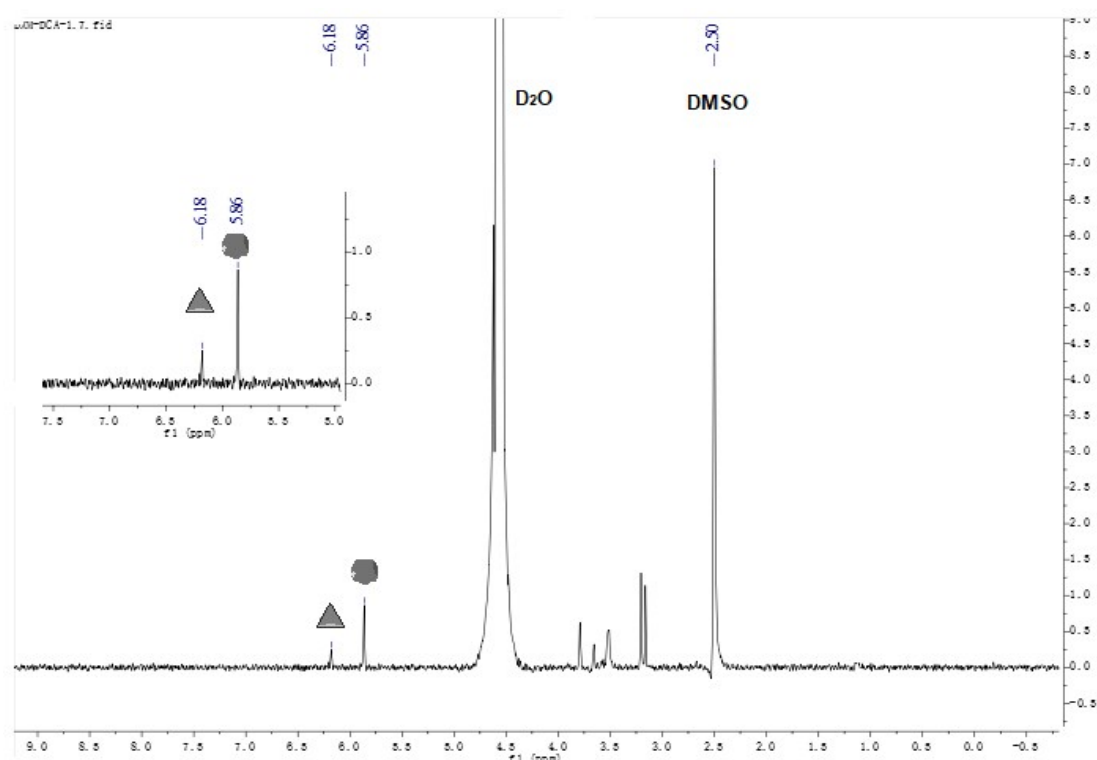

**Fig.24.** <sup>1</sup>H NMR spectra of complex **1a** treated with PBS (7.87 mM, pH 7.4; at 37°C) at 150 mins (DMSO-*d*<sub>6</sub>/D<sub>2</sub>O, 10/90, v/v). ▲ indicates the peak of coordinated DCA in complex **1a**. ● indicates the peak of free DCA.

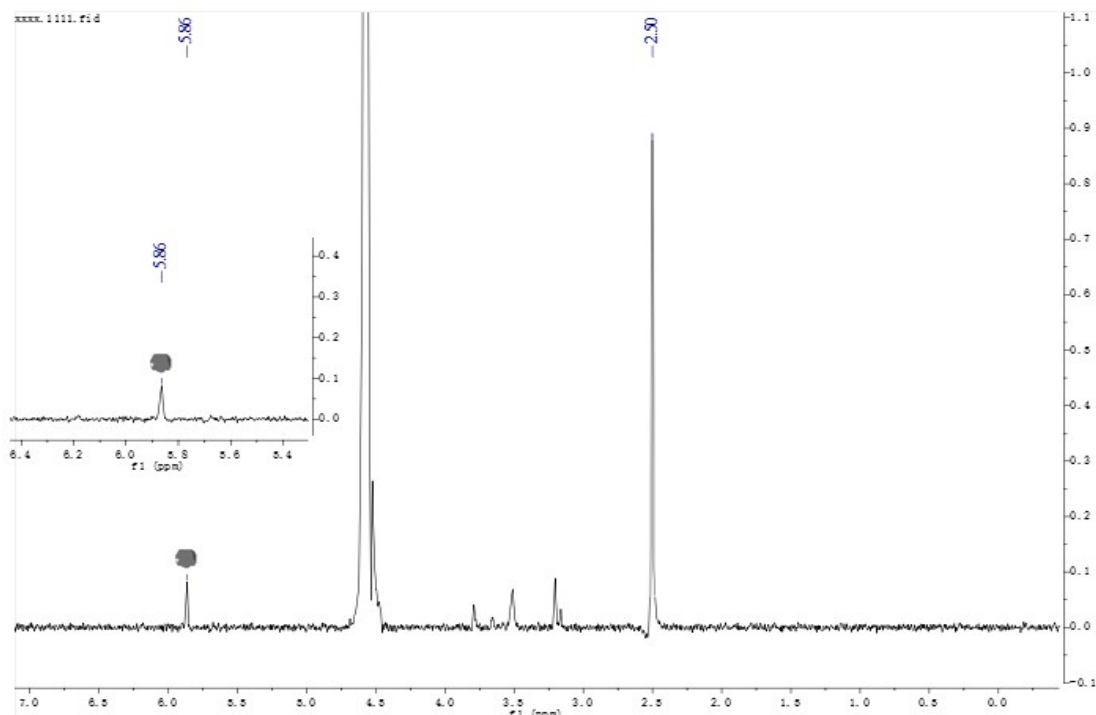

**Fig.25.**  $^1\text{H}$  NMR spectra of complex **1a** treated with PBS (7.87 mM, pH 7.4; at  $37^\circ\text{C}$ ) at 200 mins (DMSO- $d_6$ / $\text{D}_2\text{O}$ , 10/90, v/v).  $\blacktriangle$  indicates the peak of coordinated DCA in complex **1a**.  $\bullet$  indicates the peak of free DCA.

(b)  $^1\text{H}$ -NMR(400 MHz,  $^1\text{H}$ ) spectra of complex **1b** in deuterated aqueous, phosphate buffered solution

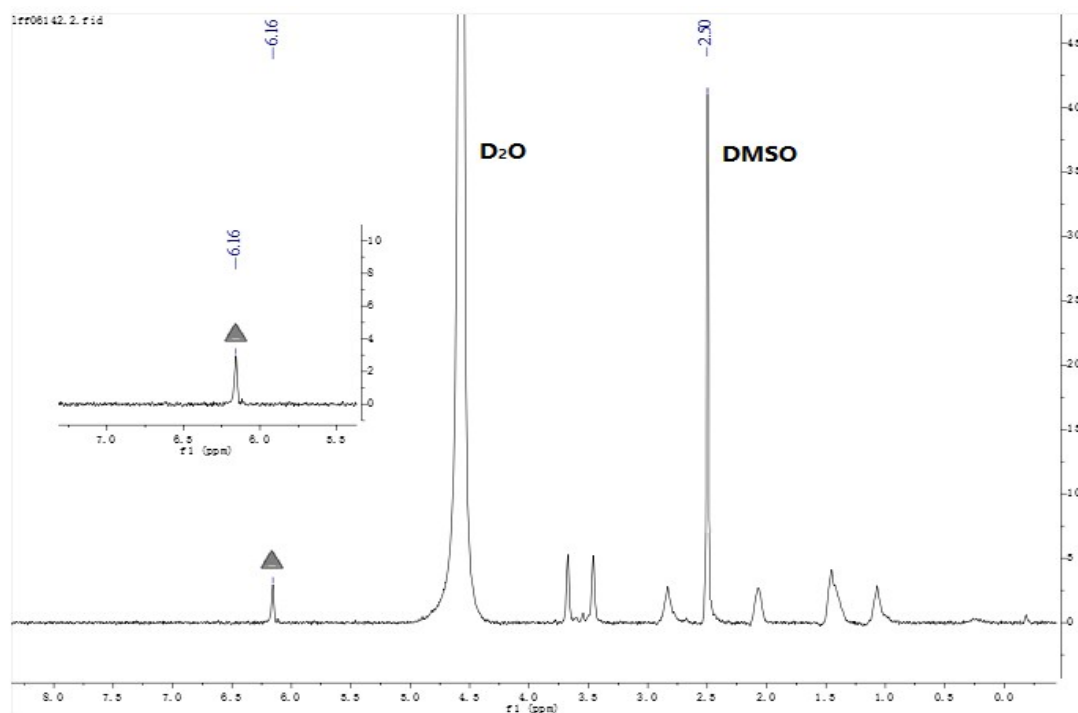

**Fig.26.**  $^1\text{H}$  NMR spectra of complex **1b** treated with PBS (7.87 mM, pH 7.4; at  $37^\circ\text{C}$ ) at 0 min (DMSO- $d_6$ / $\text{D}_2\text{O}$ , 10/90, v/v).  $\blacktriangle$  indicates the peak of coordinated DCA in complex **1b**.



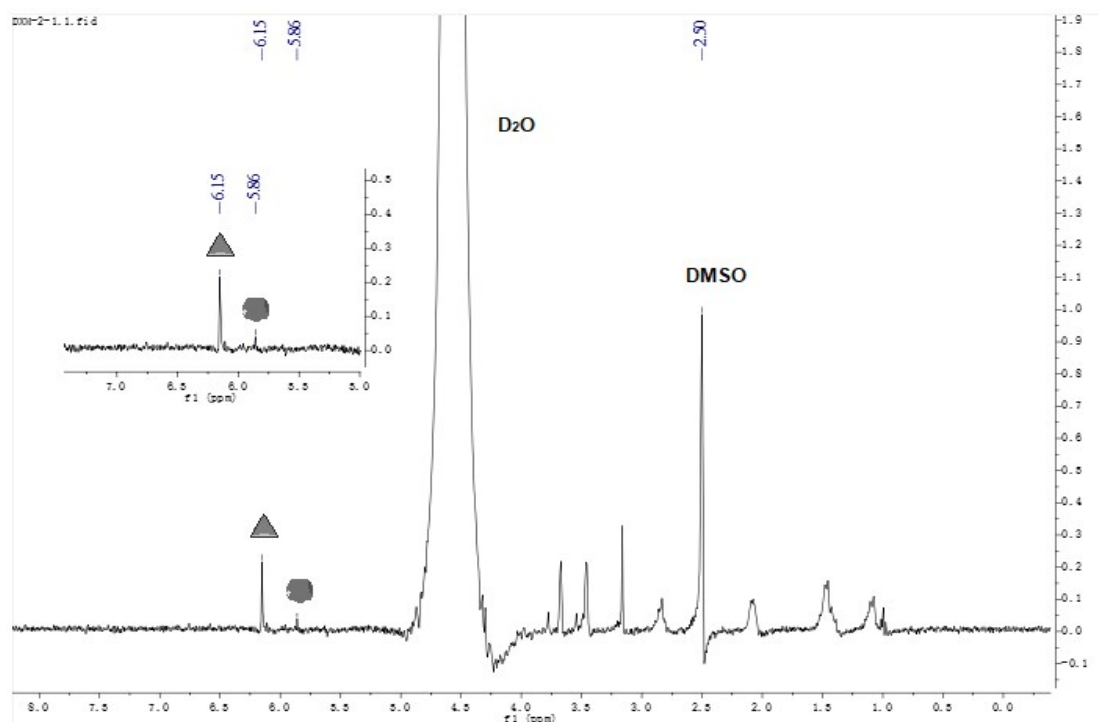

**Fig.27.**  $^1\text{H}$  NMR spectra of complex **1b** treated with PBS (7.87 mM, pH 7.4; at  $37^\circ\text{C}$ ) at 30 mins (DMSO- $d_6$ /D $_2$ O, 10/90, v/v).  $\blacktriangle$  indicates the peak of coordinated DCA in complex **1b**.  $\bullet$  indicates the peak of free DCA.

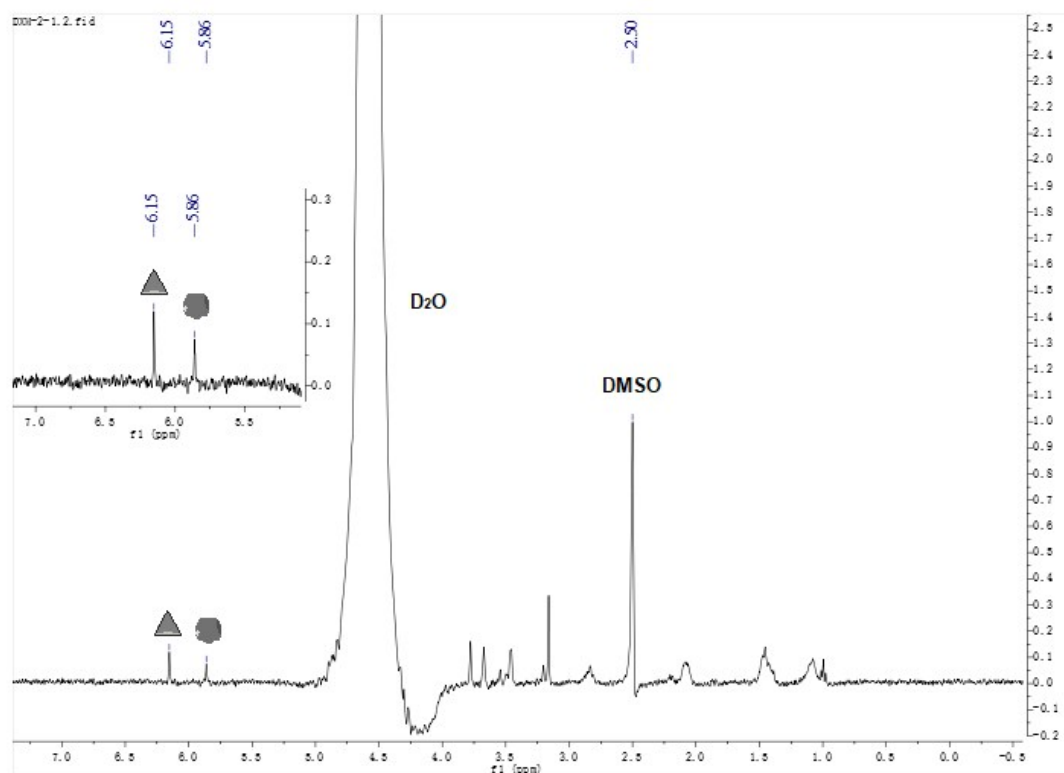

**Fig.28.**  $^1\text{H}$  NMR spectra of complex **1b** treated with PBS (7.87 mM, pH 7.4; at  $37^\circ\text{C}$ ) at 60 mins (DMSO- $d_6$ /D $_2$ O, 10/90, v/v).  $\blacktriangle$  indicates the peak of coordinated DCA in complex **1b**.  $\bullet$  indicates the peak of free DCA.

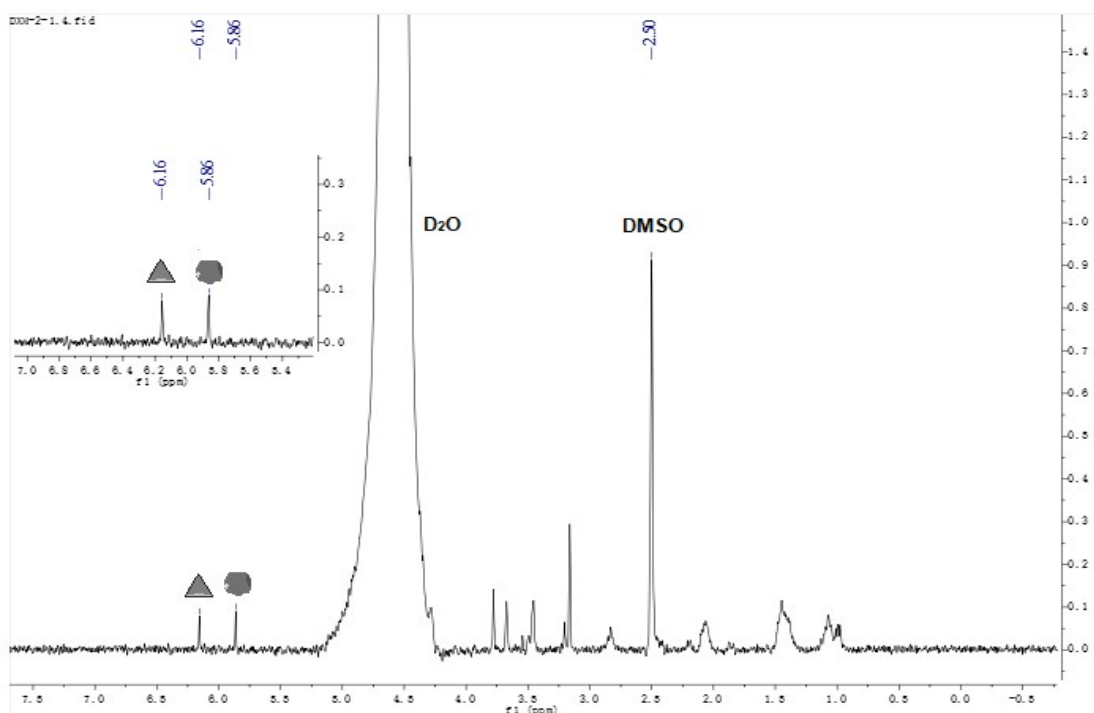

**Fig.29.**  $^1\text{H}$  NMR spectra of complex **1b** treated with PBS (7.87 mM, pH 7.4; at 37°C) at 120 mins (DMSO- $d_6$ /D $_2$ O, 10/90, v/v).  $\blacktriangle$  indicates the peak of coordinated DCA in complex **1b**.  $\bullet$  indicates the peak of free DCA.

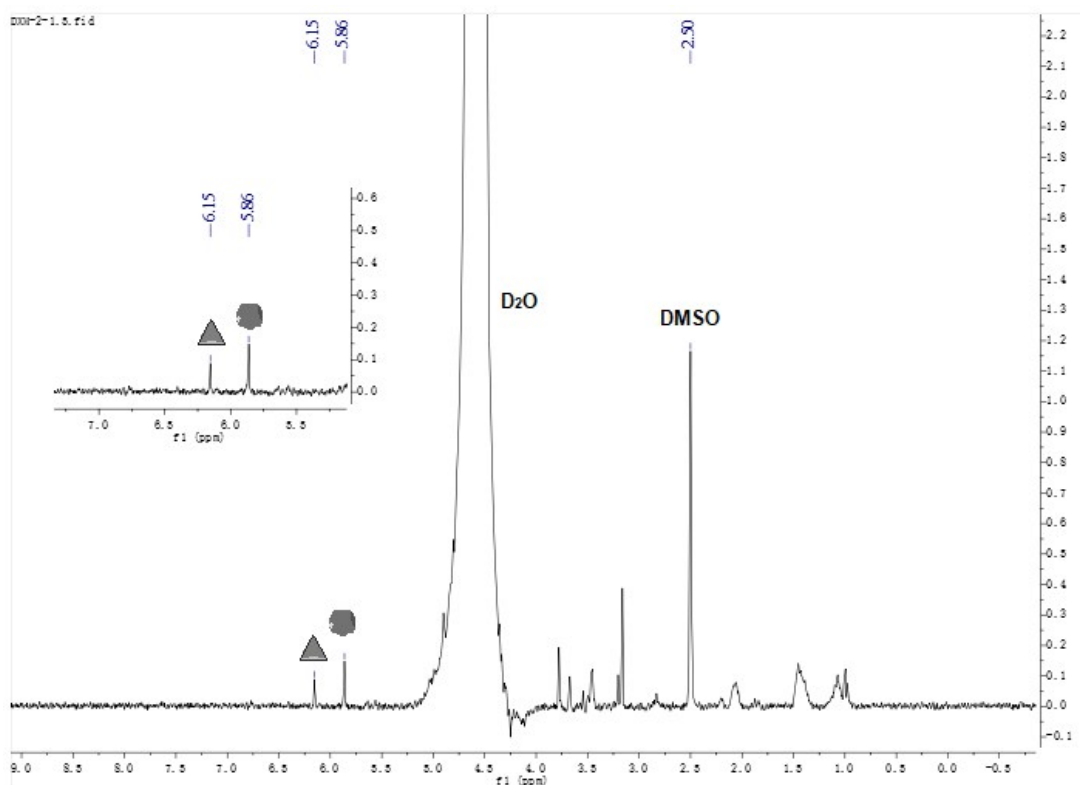

**Fig.30.**  $^1\text{H}$  NMR spectra of complex **1b** treated with PBS (7.87 mM, pH 7.4; at 37°C) at 180 mins (DMSO- $d_6$ /D $_2$ O, 10/90, v/v).  $\blacktriangle$  indicates the peak of coordinated DCA in complex **1b**.  $\bullet$  indicates the peak of free DCA.

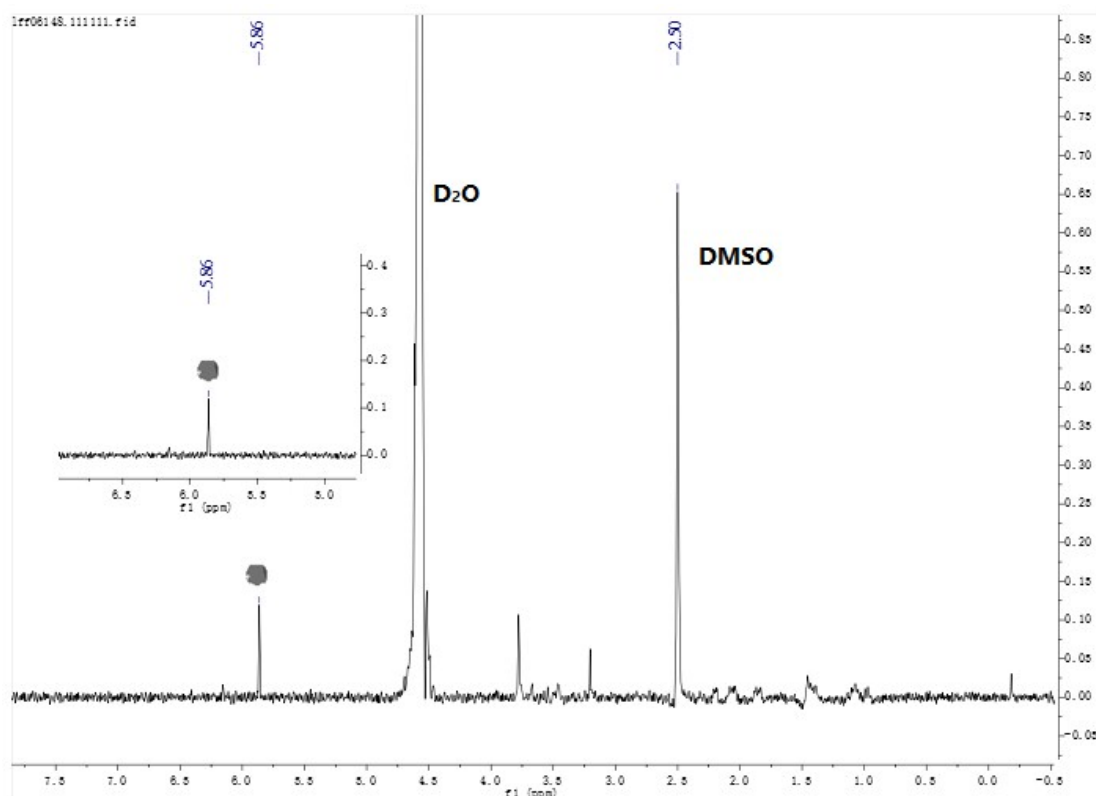

**Fig.31.**  $^1\text{H}$  NMR spectra of complex **1b** treated with PBS (7.87 mM, pH 7.4; at  $37^\circ\text{C}$ ) at 250 mins (DMSO- $d_6$ /D $_2$ O, 10/90, v/v). ● indicates the peak of free DCA.

(c) HPLC spectra of complex **1a** and **1b** in phosphate buffered solution

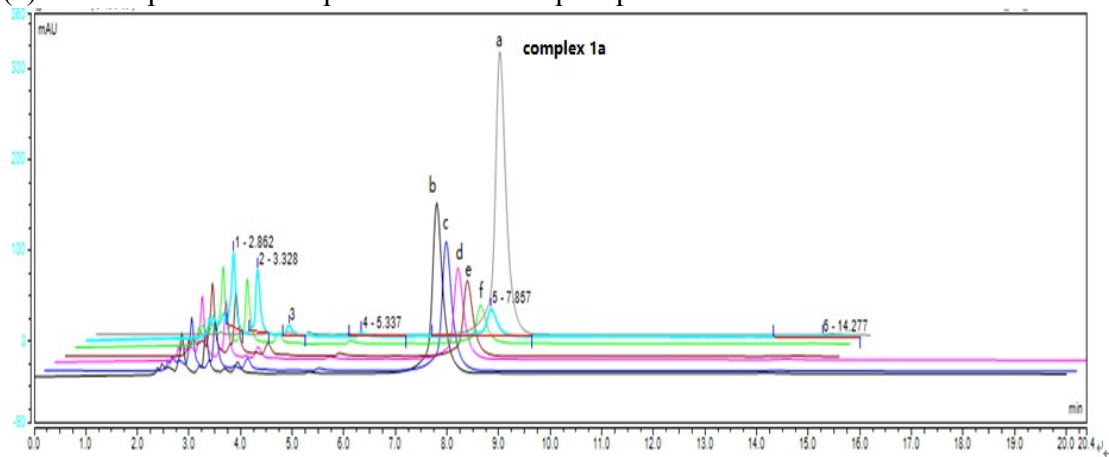

**Fig. S32.** Complex **1a** in PBS (PBS 7.87 mM, pH 7.4; at  $37^\circ\text{C}$ ): (a) 0 min; (b) 50 min; (c) 80 min; (d) 100 min; (e) 150min; (f) 180min (250 $\times$ 4.6 mm ODS; 226 nm; MeCN : H $_2$ O = 25:75 (v/v); 1.0 mL/min)

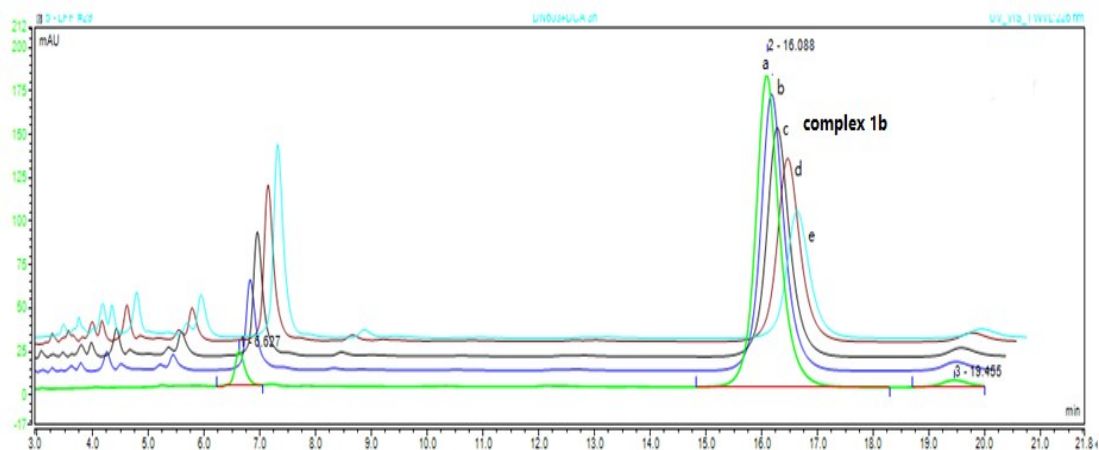

**Fig. S33.** Complex **1b** in PBS (PBS 7.87 mM, pH 7.4; at 37°C): (a) 0 min; (b) 15 min; (c) 30 min; (d) 60 min; (e) 150min (250×4.6 mm ODS; 226 nm; MeCN : H<sub>2</sub>O = 25:75 (v/v); 1.0 mL/min)

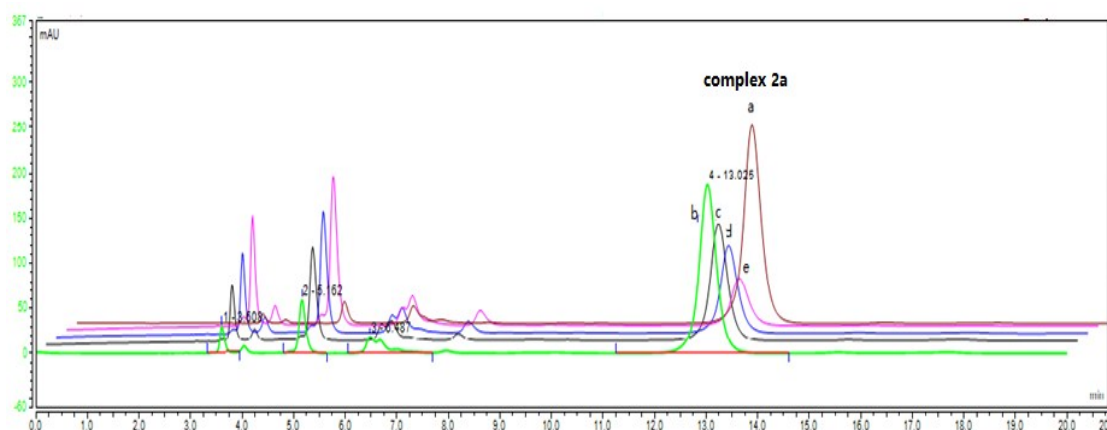

**Fig. S34.** Complex **2a** in PBS (PBS 7.87 mM, pH 7.4; at 37°C): (a) 0 min; (b)30min; (c)60 min; (d)90 min; (e)150min (250×4.6 mm ODS; 226 nm; MeCN : H<sub>2</sub>O = 25:75 (v/v); 1.0 mL/min)

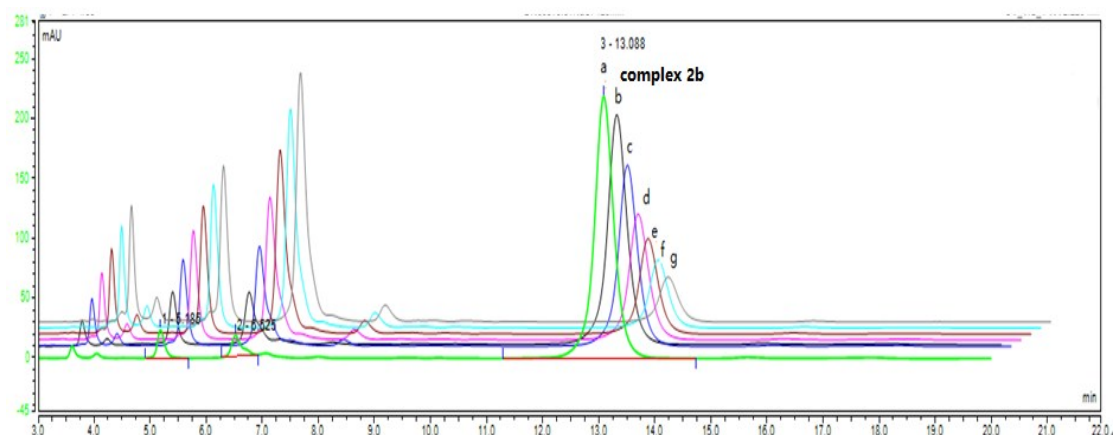

**Fig. S35.** Complex **2b** in PBS(PBS 7.87 mM, pH 7.4; at 37°C): (a) 0 min; (b)30min; (c)45 min; (d)60 min; (e)85min; (f)100min; (g)130min (250×4.6 mm ODS; 226 nm; MeCN : H<sub>2</sub>O = 25:75 (v/v); 1.0 mL/min)

#### 4. The stability of complexes 1a-2b in MeOH

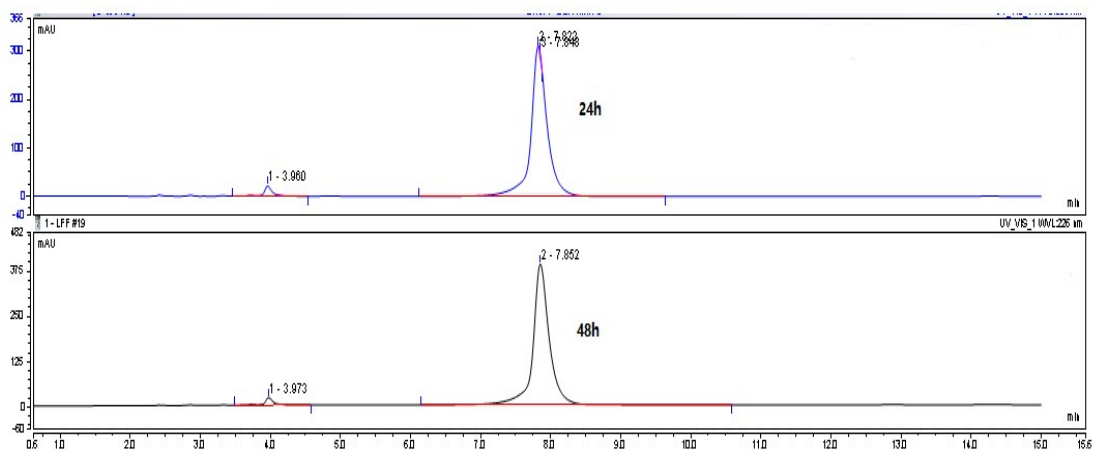

**Fig.36.** The stability of complexes **1a** in MeOH (0-48h); (250×4.6 mm ODS; 226 nm; MeCN : H<sub>2</sub>O = 25:75 (v/v); 1.0 mL/min)

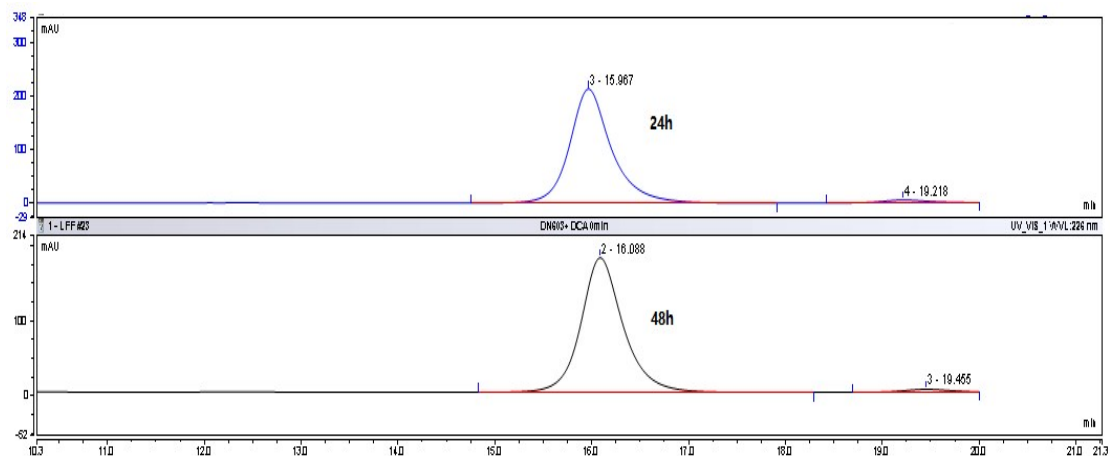

**Fig.37.** The stability of complexes **1b** in MeOH (0-48h); (250×4.6 mm ODS; 226 nm; MeCN : H<sub>2</sub>O = 25:75 (v/v); 1.0 mL/min)

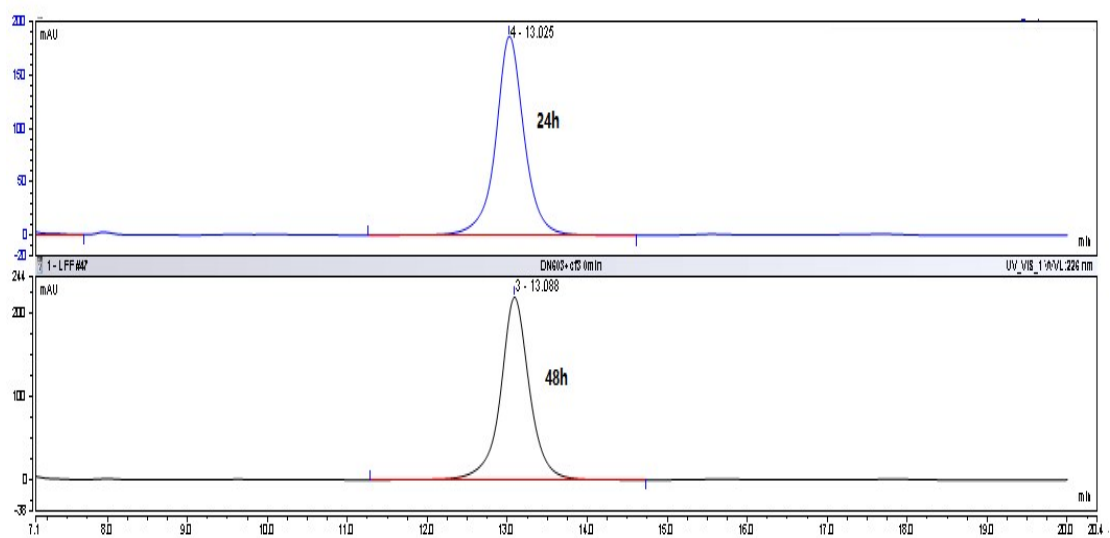

**Fig.38.** The stability of complexes **2a** in MeOH (0-48h); (250×4.6 mm ODS; 226 nm; MeCN : H<sub>2</sub>O = 25:75 (v/v); 1.0 mL/min)

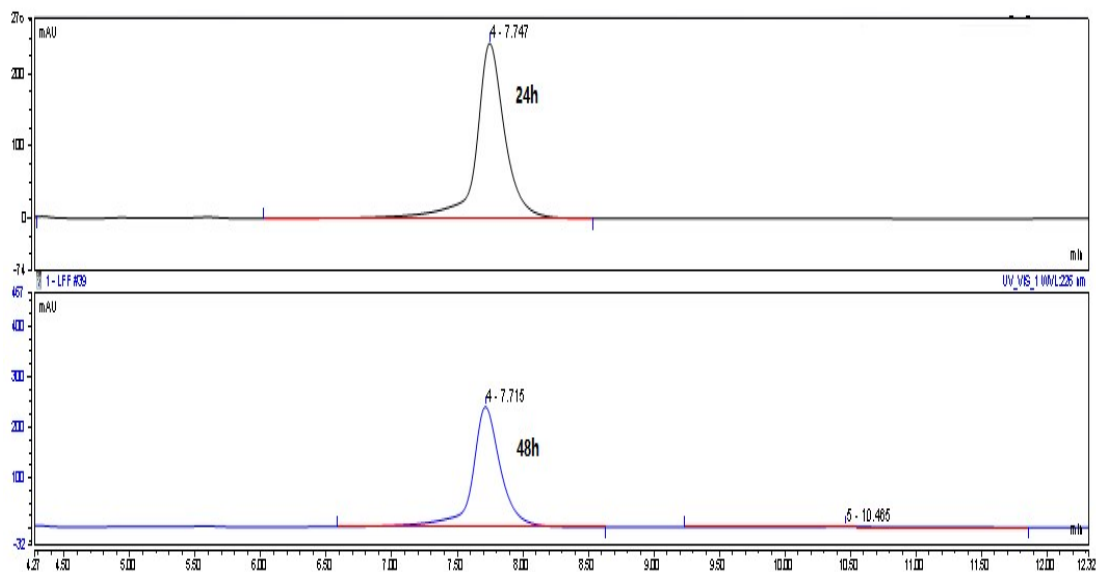

**Fig.39.** The stability of complexes **2b** in MeOH (0-48h); (250×4.6 mm ODS; 226 nm; MeCN : H<sub>2</sub>O = 25:75 (v/v); 1.0 mL/min)

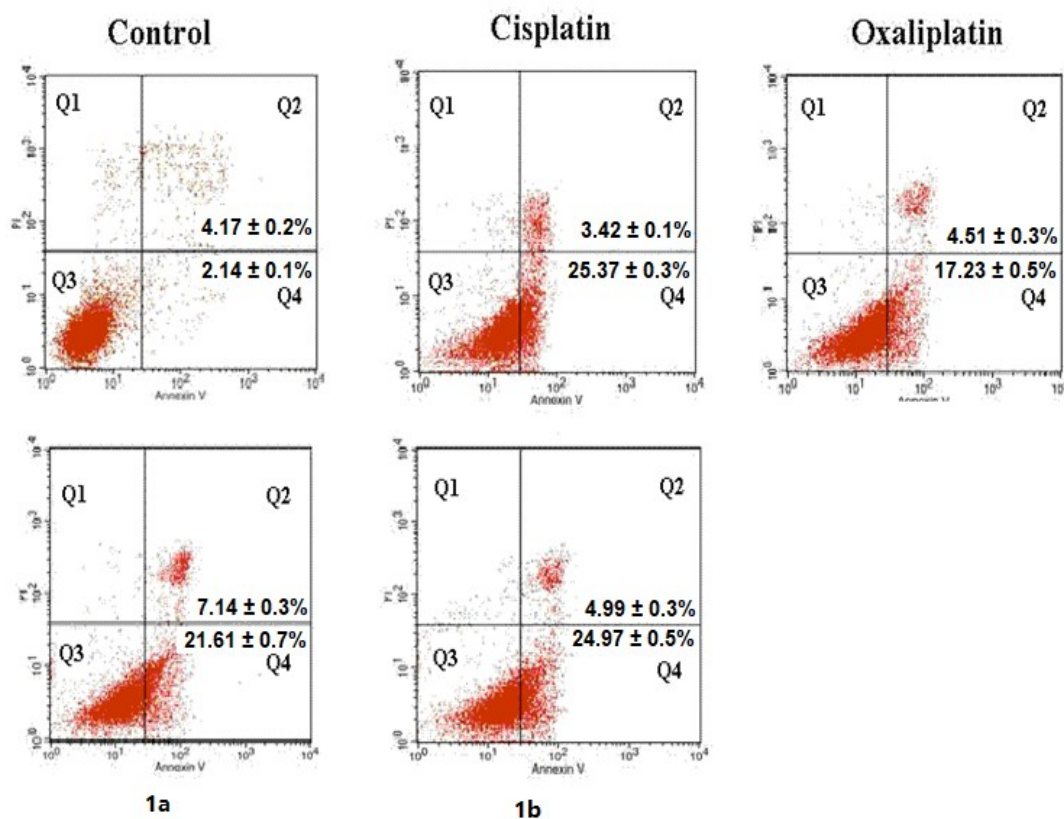

**Fig.40.** Flow cytometric analysis of the distribution of HepG-2 cells treated with 50  $\mu$ M of cisplatin, oxaliplatin, complex **1a** and **1b** for 24 hours (DMF final concentration < 0.4%). Cells were stained with 5 mL of Annexin V-FITC and incubated in the dark at 25 °C for 10 mins. The fluorescence was measured by using a flow cytometer. The results were expressed as the percentage of normal and apoptotic cells at various stages by FCSExpress software.

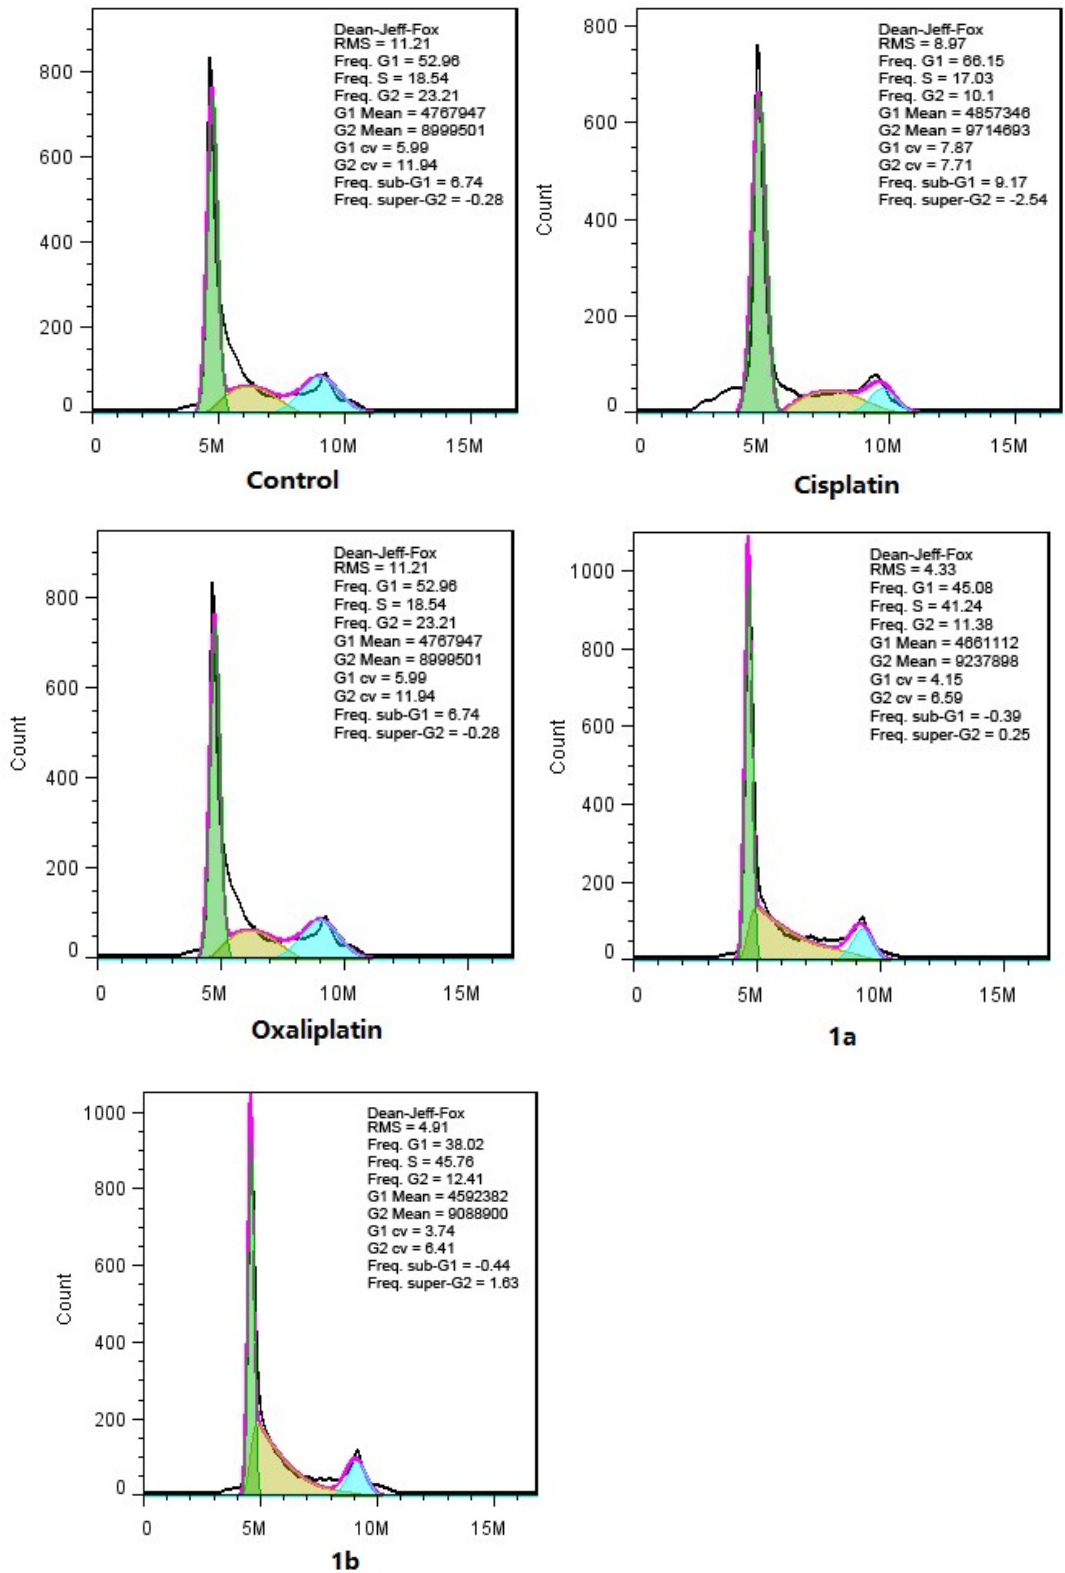

**Fig.41.** Cell cycle distribution of HepG-2 cells cultured in the presence of 30  $\mu$ M of cisplatin, oxaliplatin, complex **1a** and **1b** (DMF final concentration < 0.4%). The cells were seeded in 6-well plates for 12 hours, and then the cells were treated with cisplatin, oxaliplatin, complex **1a** and **1b**. After 12 hours of treatment, cells were harvested with trypsin and washed twice with PBS.
